# Supplementary material for: Eight-year variations in atmospheric radiocesium in Fukushima City
Source: Copernicus journal article supplement (doi:10.5194/acp-2021-591), 2021-07-30
Supplement: Supplementary file 1 [file acp-2021-591-supplement.zip]

## Sheet: Description
Tab name		Data used
1 Concentration	Surface air activity concentrations of Cs-134 and Cs-137 collected by a high-volume air sampler	Fig. 2
2 Deposition	Deposition of Cs-134 and Cs-137 collected by a precipitation sampler	Fig. 3
3 Cascade Impactor	Size resolved surface air activity concentrations of Cs-137 collected by high volume air sampler with cascade impactor	Fig. 4
4 Impactor-Cyclone	Size resolved surface air activity concentrations of Cs-137 collected by a impactor/cyclone system	Fig. 5a
5 PMf-XRF	Chemical composition of PMf (fine mode mass collected by a impactor/cyclone system) as measured by XRF	Fig. 6
6 all-XRF	Chemical compositions of sediments, PMf, and particulate fraction of precipitation as measured by XRF	Fig. 7

## Sheet: 1 Concentration
Sampling start time
yyyy/mm/dd hh:mm (LT)	Cs-134 Bq/m3	Cs-137 Bq/m3
2011-05-18 10:48:00	0.0028 ± 0.0003	0.0029 ± 0.0004
2011-05-22 13:30:00	0.00077 ± 0.0001	0.0009 ± 0.0002
2011-05-23 17:50:00	0.016 ± 0.002	0.017 ± 0.002
2011-05-24 20:50:00	0.0039 ± 0.0005	0.0046 ± 0.0009
2011-05-26 11:18:00	0.0052 ± 0.0007	0.0055 ± 0.0008
2011-05-27 12:33:00	0.0027 ± 0.0003	0.0026 ± 0.0004
2011-05-28 12:50:00	0.006 ± 0.001	0.0068 ± 0.0008
2011-05-30 11:46:00	0.00013 ± 0.00003	0.00018 ± 0.00002
2011-05-31 11:58:00	0.00026 ± 0.00003	0.00028 ± 0.00003
2011-06-01 18:01:00	0.002 ± 0.0003	0.0025 ± 0.0003
2011-06-02 19:38:00	0.0012 ± 0.0003	0.0017 ± 0.0002
2011-06-03 19:51:00	0.0012 ± 0.0002	0.0013 ± 0.0002
2011-06-05 13:47:00	0.00031 ± 0.00006	0.00036 ± 0.00004
2011-06-06 17:30:00	0.00044 ± 0.00005	0.00047 ± 0.00006
2011-06-07 17:48:00	0.0012 ± 0.0003	0.0015 ± 0.0002
2011-06-08 18:06:00	0.0022 ± 0.0004	0.0025 ± 0.0003
2011-06-09 18:16:00	0.0008 ± 0.0001	0.00083 ± 0.0001
2011-06-11 09:53:00	0.00064 ± 0.00007	0.00075 ± 0.0001
2011-06-12 11:05:00	0.00043 ± 0.00005	0.00048 ± 0.00006
2011-06-13 11:27:00	0.00034 ± 0.00004	0.00032 ± 0.00006
2011-06-14 12:15:00	0.00016 ± 0.00002	0.00012 ± 0.00002
2011-06-15 12:24:00	0.0021 ± 0.0003	0.0023 ± 0.0003
2011-06-16 18:07:00	0.0025 ± 0.0003	0.0029 ± 0.0003
2011-06-17 18:44:00	0.0019 ± 0.0002	0.0018 ± 0.0002
2011-06-19 10:07:00	0.00065 ± 0.00009	0.0007 ± 0.00009
2011-06-20 10:55:00	0.0033 ± 0.0004	0.0035 ± 0.0004
2011-06-21 12:12:00	0.0012 ± 0.0002	0.001 ± 0.0002
2011-06-22 12:46:00	0.0013 ± 0.0002	0.0014 ± 0.0002
2011-06-23 13:12:00	0.00055 ± 0.0001	0.0007 ± 0.0001
2011-06-24 18:57:00	0.00033 ± 0.00008	0.0005 ± 0.0001
2011-06-25 19:35:00	0.0011 ± 0.0001	0.001 ± 0.0001
2011-06-27 12:10:00	0.00041 ± 0.00007	0.00045 ± 0.00007
2011-06-28 13:15:00	0.00017 ± 0.00005	0.00022 ± 0.00005
2011-06-29 18:23:00	0.0013 ± 0.0002	0.0013 ± 0.0002
2011-06-30 19:02:00	0.00018 ± 0.00004	0.00028 ± 0.00005
2011-07-01 19:36:00	0.0017 ± 0.0002	0.0017 ± 0.0002
2011-07-02 19:50:00	0.00026 ± 0.00006	0.00039 ± 0.00007
2011-07-04 09:04:00	0.00048 ± 0.00008	0.0007 ± 0.0001
2011-07-05 12:57:00	0.00051 ± 0.00009	0.0007 ± 0.0001
2011-07-06 14:54:00	0.0058 ± 0.0007	0.0056 ± 0.0007
2011-07-07 18:54:00	0.001 ± 0.0001	0.0011 ± 0.0001
2011-07-08 19:09:00	0.003 ± 0.0003	0.0034 ± 0.0004
2011-07-10 07:10:00	0.0009 ± 0.0001	0.001 ± 0.0001
2011-07-11 12:05:00	0.0011 ± 0.0001	0.0011 ± 0.0001
2011-07-12 12:33:00	0.0007 ± 0.0001	0.0008 ± 0.0001
2011-07-13 12:37:00	0.0014 ± 0.0002	0.0016 ± 0.0002
2011-07-14 14:20:00	0.00063 ± 0.00008	0.00069 ± 0.00009
2011-07-15 20:00:00	0.0022 ± 0.0003	0.0028 ± 0.0003
2011-07-17 10:42:00	0.0011 ± 0.0001	0.0012 ± 0.0001
2011-07-18 14:14:00	0.0013 ± 0.0002	0.0014 ± 0.0002
2011-07-19 17:50:00	0.00067 ± 0.00009	0.0008 ± 0.0001
2011-07-20 18:48:00	0.00008 ± 0.00003	0.00005 ± 0.00002
2011-07-21 19:05:00	0.00023 ± 0.00004	0.00025 ± 0.00004
2011-07-22 19:51:00	0.00029 ± 0.00006	0.00036 ± 0.00006
2011-07-23 20:00:00	0.00032 ± 0.00005	0.00039 ± 0.00006
2011-07-25 09:12:00	0.0006 ± 0.00009	0.00053 ± 0.00008
2011-07-26 12:26:00	0.00025 ± 0.00005	0.00032 ± 0.00005
2011-07-27 12:36:00	0.00036 ± 0.00007	0.00037 ± 0.00007
2011-07-28 12:45:00	0.00048 ± 0.00006	0.00053 ± 0.00007
2011-07-29 13:24:00	0.00031 ± 0.00007	0.0004 ± 0.00008
2011-07-30 17:20:00	0.00014 ± 0.00004	0.00023 ± 0.00005
2011-07-31 18:36:00	0.00015 ± 0.00003	0.00017 ± 0.00003
2011-08-01 18:46:00	0.00024 ± 0.00005	0.00023 ± 0.00005
2011-08-02 19:24:00	0.0024 ± 0.0003	0.0028 ± 0.0003
2011-08-03 19:31:00	0.0028 ± 0.0003	0.0031 ± 0.0004
2011-08-04 19:55:00	0.00021 ± 0.00003	0.00022 ± 0.00003
2011-08-06 15:06:00	0.0011 ± 0.00013	0.0013 ± 0.0002
2011-08-07 16:36:00	0.00048 ± 0.00006	0.0005 ± 0.00006
2011-08-08 15:09:00	0.00024 ± 0.00003	0.00029 ± 0.00004
2011-08-09 18:20:00	0.00026 ± 0.00004	0.00022 ± 0.00003
2011-08-11 09:11:00	0.00047 ± 0.00006	0.00046 ± 0.00005
2011-08-12 10:22:00	0.0001 ± 0.00003	0.00022 ± 0.00004
2011-08-13 17:59:00	0.00037 ± 0.00005	0.00033 ± 0.00005
2011-08-14 20:12:00	0.00027 ± 0.00007	0.00039 ± 0.00007
2011-08-16 07:18:00	0.00011 ± 0.00003	0.00015 ± 0.00003
2011-08-17 10:19:00	0.00016 ± 0.00004	0.00023 ± 0.00005
2011-08-18 10:48:00	0.00082 ± 0.0001	0.0008 ± 0.0001
2011-08-19 12:46:00	0.00041 ± 0.00006	0.00053 ± 0.00007
2011-08-20 14:40:00	0.00022 ± 0.00004	0.0002 ± 0.00003
2011-08-22 10:29:00	0.00026 ± 0.00005	0.00039 ± 0.00006
2011-08-26 16:41:00	0.0008 ± 0.0001	0.0009 ± 0.0001
2011-08-27 16:51:00	0.00057 ± 0.00007	0.00058 ± 0.00007
2011-08-29 12:22:00	0.0009 ± 0.0001	0.0011 ± 0.0001
2011-08-30 12:47:00	0.00031 ± 0.00005	0.00024 ± 0.00004
2011-08-31 20:02:00	0.00023 ± 0.00003	0.00025 ± 0.00003
2011-09-01 20:08:00	0.00021 ± 0.00003	0.0002 ± 0.00003
2011-09-02 20:42:00	0.00078 ± 0.00009	0.0008 ± 0.00009
2011-09-06 08:37:00	0.00048 ± 0.00006	0.00051 ± 0.00006
2011-09-09 10:05:00	0.0002 ± 0.00002	0.00021 ± 0.00003
2011-09-12 19:03:00	0.00021 ± 0.00003	0.00021 ± 0.00003
2011-09-16 10:30:00	0.00023 ± 0.00003	0.00023 ± 0.00003
2011-09-19 11:51:00	0.000048 ± 0.000009	0.000051 ± 0.000008
2011-09-23 06:36:00	0.00013 ± 0.00002	0.00014 ± 0.00002
2011-09-26 16:56:00	0.00015 ± 0.00002	0.00018 ± 0.00002
2011-09-29 18:03:00	0.00024 ± 0.00003	0.00025 ± 0.00003
2011-10-03 09:11:00	0.00013 ± 0.00002	0.00014 ± 0.00002
2011-10-07 09:09:00	0.00023 ± 0.00003	0.00023 ± 0.00003
2011-10-11 09:11:00	0.00014 ± 0.00002	0.00016 ± 0.00002
2011-10-14 16:20:00	0.0001 ± 0.00001	0.00011 ± 0.00001
2011-10-17 17:09:00	0.0002 ± 0.00002	0.00021 ± 0.00002
2011-10-20 20:08:00	0.0001 ± 0.00001	0.00012 ± 0.00001
2011-10-24 09:12:00	0.00009 ± 0.00001	0.0001 ± 0.00001
2011-10-27 09:21:00	0.00055 ± 0.00006	0.00064 ± 0.00007
2011-10-31 12:33:00	0.00016 ± 0.00002	0.00019 ± 0.00002
2011-11-04 12:22:00	0.00016 ± 0.00002	0.00018 ± 0.00002
2011-11-07 12:53:00	0.00007 ± 0.00001	0.00009 ± 0.00001
2011-11-10 14:42:00	0.00009 ± 0.00002	0.00012 ± 0.00002
2011-11-14 11:52:00	0.00009 ± 0.00001	0.00012 ± 0.00001
2011-11-17 11:52:00	0.00041 ± 0.00005	0.00047 ± 0.00005
2011-11-21 12:02:00	0.00034 ± 0.00004	0.00037 ± 0.00004
2011-11-24 18:52:00	0.00009 ± 0.00001	0.00012 ± 0.00001
2011-11-28 09:10:00	0.00034 ± 0.00004	0.00039 ± 0.00004
2011-12-01 10:05:00	0.00011 ± 0.00002	0.00012 ± 0.00002
2011-12-05 09:16:00	0.0003 ± 0.00004	0.00035 ± 0.00004
2011-12-08 21:03:00	0.00019 ± 0.00002	0.00022 ± 0.00002
2011-12-12 09:17:00	0.00034 ± 0.00004	0.00039 ± 0.00005
2011-12-15 18:50:00	0.00022 ± 0.00003	0.00025 ± 0.00003
2011-12-19 09:14:00	0.00021 ± 0.00003	0.00024 ± 0.00003
2011-12-22 10:37:00	0.0016 ± 0.0002	0.0018 ± 0.0002
2011-12-26 09:17:00	0.0003 ± 0.00004	0.00035 ± 0.00004
2011-12-29 09:17:00	0.00085 ± 0.0001	0.001 ± 0.0001
2012-01-04 09:17:00	0.00026 ± 0.00003	0.00031 ± 0.00004
2012-01-09 09:17:00	0.0011 ± 0.0001	0.0012 ± 0.0001
2012-01-12 09:17:00	0.0012 ± 0.0001	0.0013 ± 0.0002
2012-01-16 09:15:00	0.0007 ± 0.00008	0.0009 ± 0.0001
2012-01-19 14:11:00	0.00009 ± 0.00001	0.0001 ± 0.00001
2012-01-23 09:17:00	0.00046 ± 0.00005	0.00053 ± 0.00006
2012-01-26 20:26:00	0.00029 ± 0.00003	0.00038 ± 0.00004
2012-01-30 09:13:00	ND	ND
2012-02-02 10:04:00	0.00036 ± 0.00004	0.00046 ± 0.00005
2012-02-06 09:16:00	0.00086 ± 0.0001	0.0009 ± 0.0001
2012-02-09 13:15:00	0.00054 ± 0.00006	0.00082 ± 0.00008
2012-02-13 09:17:00	0.00058 ± 0.00006	0.00084 ± 0.00009
2012-02-16 14:45:00	0.0011 ± 0.0001	0.0016 ± 0.0002
2012-02-20 09:15:00	0.00086 ± 0.00009	0.0014 ± 0.0001
2012-02-24 09:15:00	0.00036 ± 0.00004	0.00053 ± 0.00006
2012-02-27 10:17:00	0.00012 ± 0.00001	0.00016 ± 0.00002
2012-03-01 13:02:00	0.00012 ± 0.00001	0.00017 ± 0.00002
2012-03-05 09:15:00	0.00009 ± 0.00001	0.00013 ± 0.00002
2012-03-08 09:20:00	0.00021 ± 0.00003	0.00033 ± 0.00004
2012-03-12 08:39:00	0.0006 ± 0.00006	0.00097 ± 0.0001
2012-03-15 14:08:00	0.00023 ± 0.00003	0.00036 ± 0.00004
2012-03-19 09:10:00	0.00044 ± 0.00005	0.00062 ± 0.00006
2012-03-22 09:45:00	0.00014 ± 0.00002	0.00019 ± 0.00002
2012-03-26 09:12:00	0.00028 ± 0.00003	0.00039 ± 0.00004
2012-03-29 09:42:00	0.00031 ± 0.00003	0.00043 ± 0.00005
2012-04-02 09:30:00	0.0012 ± 0.0001	0.0017 ± 0.0002
2012-04-05 10:52:00	0.00027 ± 0.00003	0.00033 ± 0.00004
2012-04-09 12:25:00	0.00036 ± 0.00004	0.00054 ± 0.00006
2012-04-12 12:55:00	0.00023 ± 0.00002	0.00033 ± 0.00003
2012-04-16 09:37:00	0.00012 ± 0.00001	0.00016 ± 0.00002
2012-04-19 10:23:00	ND	ND
2012-04-23 10:10:00	0.00014 ± 0.00002	0.00022 ± 0.00003
2012-04-26 11:04:00	0.00008 ± 0.00001	0.00011 ± 0.00002
2012-05-01 09:12:00	0.00015 ± 0.00002	0.0002 ± 0.00002
2012-05-04 17:32:00	0.000024 ± 0.000003	0.000035 ± 0.000004
2012-05-07 17:55:00	0.00016 ± 0.00002	0.00025 ± 0.00003
2012-05-10 20:25:00	0.00009 ± 0.00001	0.00014 ± 0.00002
2012-05-14 18:40:00	0.00015 ± 0.00002	0.00022 ± 0.00003
2012-05-17 18:50:00	0.000068 ± 0.000008	0.0001 ± 0.00001
2012-05-21 09:25:00	0.00007 ± 0.00001	0.00011 ± 0.00002
2012-05-25 13:50:00	0.00009 ± 0.00001	0.00016 ± 0.00002
2012-05-28 14:17:00	0.000066 ± 0.00001	0.0001 ± 0.00001
2012-05-31 14:25:00	0.0001 ± 0.00001	0.00018 ± 0.00002
2012-06-04 09:20:00	0.00012 ± 0.00002	0.00017 ± 0.00002
2012-06-07 14:20:00	0.00012 ± 0.00001	0.00017 ± 0.00002
2012-06-11 09:20:00	0.00004 ± 0.000008	0.00008 ± 0.00001
2012-06-14 10:00:00	0.00017 ± 0.00002	0.00023 ± 0.00003
2012-06-18 09:36:00	0.000045 ± 0.000006	0.00009 ± 0.00001
2012-06-22 18:05:00	0.000045 ± 0.000007	0.00008 ± 0.00001
2012-06-26 09:25:00	0.000045 ± 0.000008	0.00009 ± 0.00001
2012-06-29 10:05:00	0.000042 ± 0.000007	0.00008 ± 0.00001
2012-07-01 12:20:00	0.00009 ± 0.00001	0.00013 ± 0.00002
2012-07-05 12:37:00	0.00017 ± 0.00002	0.00026 ± 0.00003
2012-07-09 09:45:00	0.00018 ± 0.00002	0.00025 ± 0.00003
2012-07-12 16:10:00	0.00009 ± 0.00001	0.00012 ± 0.00002
2012-07-15 19:00:00	0.00009 ± 0.00001	0.00014 ± 0.00002
2012-07-19 09:18:00	0.0001 ± 0.00001	0.00015 ± 0.00002
2012-07-23 09:54:00	0.00009 ± 0.00001	0.00014 ± 0.00002
2012-07-26 12:13:00	0.0003 ± 0.00003	0.00051 ± 0.00005
2012-07-30 10:50:00	0.000058 ± 0.000008	0.00009 ± 0.00001
2012-08-03 14:15:00	0.000084 ± 0.00001	0.00013 ± 0.00002
2012-08-06 14:45:00	0.000065 ± 0.000009	0.00009 ± 0.00001
2012-08-09 18:25:00	0.00007 ± 0.00001	0.00011 ± 0.00001
2012-08-12 18:50:00	0.00005 ± 0.000006	0.0001 ± 0.00001
2012-08-15 19:10:00	0.000056 ± 0.000008	0.0001 ± 0.00001
2012-08-19 14:15:00	0.000059 ± 0.000008	0.00011 ± 0.00001
2012-08-22 14:22:00	0.000063 ± 0.000009	0.0001 ± 0.00001
2012-08-25 14:47:00	0.00008 ± 0.00001	0.00014 ± 0.00002
2012-08-28 18:32:00	0.000066 ± 0.000009	0.00011 ± 0.00001
2012-09-01 16:57:00	0.000064 ± 0.000008	0.00012 ± 0.00001
2012-09-05 19:21:00	0.00009 ± 0.00001	0.00013 ± 0.00002
2012-09-10 09:13:00	0.000044 ± 0.000007	0.00008 ± 0.00001
2012-09-13 10:09:00	0.00012 ± 0.00002	0.00021 ± 0.00002
2012-09-16 10:30:00	0.000023 ± 0.000005	0.000058 ± 0.000008
2012-09-19 11:04:00	0.00007 ± 0.00001	0.00018 ± 0.00002
2012-09-23 09:48:00	0.000033 ± 0.000006	0.000064 ± 0.000009
2012-09-26 10:24:00	0.000033 ± 0.000006	0.000065 ± 0.000009
2012-09-29 14:30:00	0.0001 ± 0.00001	0.0002 ± 0.00002
2012-10-02 15:18:00	0.000046 ± 0.00001	0.00009 ± 0.00001
2012-10-06 15:45:00	0.000028 ± 0.000008	0.00009 ± 0.00001
2012-10-09 17:45:00	0.000057 ± 0.000009	0.00011 ± 0.00001
2012-10-12 18:51:00	0.000047 ± 0.000007	0.00009 ± 0.00001
2012-10-15 19:10:00	0.000049 ± 0.000007	0.0001 ± 0.00001
2012-10-19 09:48:00	0.00013 ± 0.00002	0.00024 ± 0.00003
2012-10-22 10:05:00	0.000052 ± 0.000008	0.00011 ± 0.00001
2012-10-25 10:12:00	0.000045 ± 0.000009	0.0001 ± 0.00001
2012-10-29 09:20:00	0.0001 ± 0.00001	0.00019 ± 0.00002
2012-11-01 15:50:00	0.000021 ± 0.000005	0.000038 ± 0.000007
2012-11-05 09:24:00	0.00006 ± 0.00001	0.00009 ± 0.00001
2012-11-08 10:30:00	0.000034 ± 0.000006	0.00006 ± 0.00001
2012-11-12 09:22:00	0.000061 ± 0.000008	0.000087 ± 0.00001
2012-11-15 10:40:00	0.00007 ± 0.00001	0.00013 ± 0.00002
2012-11-19 09:21:00	0.000043 ± 0.000007	0.000087 ± 0.00001
2012-11-22 10:34:00	0.000055 ± 0.000009	0.00009 ± 0.00001
2012-11-26 09:15:00	0.000058 ± 0.000008	0.0001 ± 0.00001
2012-11-29 09:35:00	0.00017 ± 0.00002	0.00033 ± 0.00003
2012-12-03 09:19:00	0.00007 ± 0.00001	0.00015 ± 0.00002
2012-12-07 09:20:00	0.0003 ± 0.00003	0.00057 ± 0.00006
2012-12-10 10:14:00	0.000044 ± 0.000007	0.0001 ± 0.00001
2012-12-13 11:25:00	0.000072 ± 0.000008	0.00013 ± 0.00001
2012-12-17 09:47:00	0.00009 ± 0.00001	0.00016 ± 0.00002
2012-12-20 10:25:00	0.00013 ± 0.00002	0.00026 ± 0.00003
2012-12-24 10:19:00	0.00019 ± 0.00002	0.00035 ± 0.00004
2012-12-27 16:50:00	0.00007 ± 0.00001	0.00014 ± 0.00002
2012-12-31 11:25:00	0.00012 ± 0.00002	0.00023 ± 0.00003
2013-01-03 11:50:00	0.000054 ± 0.000008	0.00011 ± 0.00001
2013-01-07 12:40:00	0.000055 ± 0.000008	0.00013 ± 0.00001
2013-01-11 09:34:00	0.00012 ± 0.00002	0.00021 ± 0.00002
2013-01-14 14:00:00	0.00013 ± 0.00002	0.00024 ± 0.00003
2013-01-17 18:02:00	0.000031 ± 0.000006	0.000055 ± 0.000009
2013-01-21 09:23:00	0.000037 ± 0.000006	0.00006 ± 0.000008
2013-01-24 09:45:00	0.00008 ± 0.00001	0.00015 ± 0.00002
2013-01-28 09:15:00	0.00023 ± 0.00003	0.00043 ± 0.00005
2013-01-31 20:44:00	0.00038 ± 0.00004	0.00071 ± 0.00007
2013-02-04 08:34:00	0.00015 ± 0.00002	0.00027 ± 0.00003
2013-02-07 09:26:00	0.00009 ± 0.00001	0.00019 ± 0.00002
2013-02-12 09:18:00	0.00027 ± 0.00003	0.0005 ± 0.00006
2013-02-18 09:45:00	0.00018 ± 0.00002	0.00037 ± 0.00004
2013-02-21 09:55:00	0.00012 ± 0.00001	0.00021 ± 0.00003
2013-02-24 10:15:00	0.00007 ± 0.00001	0.00009 ± 0.00001
2013-02-27 14:35:00	0.00015 ± 0.00002	0.00035 ± 0.00004
2013-03-03 18:02:00	0.00011 ± 0.00002	0.00021 ± 0.00003
2013-03-07 09:35:00	0.00015 ± 0.00002	0.0003 ± 0.00004
2013-03-10 11:50:00	0.00014 ± 0.00002	0.00027 ± 0.00003
2013-03-13 12:01:00	0.00016 ± 0.00002	0.00031 ± 0.00004
2013-03-16 14:01:00	0.00014 ± 0.00002	0.00028 ± 0.00003
2013-03-21 09:30:00	0.000043 ± 0.000007	0.00007 ± 0.00001
2013-03-24 11:36:00	0.000062 ± 0.000009	0.00011 ± 0.00001
2013-03-27 17:53:00	0.0001 ± 0.00001	0.00017 ± 0.00002
2013-03-31 10:06:00	0.00006 ± 0.00001	0.00012 ± 0.00002
2013-04-03 17:30:00	0.00008 ± 0.00001	0.00013 ± 0.00002
2013-04-06 17:45:00	0.00007 ± 0.00001	0.00016 ± 0.00002
2013-04-09 18:30:00	0.000056 ± 0.000009	0.00009 ± 0.00001
2013-04-13 19:05:00	0.000038 ± 0.000009	0.00008 ± 0.00001
2013-04-17 09:17:00	0.00006 ± 0.00001	0.0001 ± 0.00002
2013-04-20 13:34:00	0.00008 ± 0.00001	0.00016 ± 0.00002
2013-04-23 14:02:00	0.00007 ± 0.00001	0.00015 ± 0.00002
2013-04-26 16:58:00	0.00005 ± 0.00001	0.0001 ± 0.00001
2013-04-30 09:14:00	0.000038 ± 0.000006	0.00008 ± 0.00001
2013-05-04 09:14:00	0.00006 ± 0.00001	0.00014 ± 0.00002
2013-05-07 10:11:00	0.00033 ± 0.00004	0.00064 ± 0.00008
2013-05-10 10:28:00	0.00007 ± 0.00001	0.00011 ± 0.00002
2013-05-13 12:40:00	0.00006 ± 0.00001	0.00009 ± 0.00002
2013-05-16 12:56:00	0.000014 ± 0.000004	0.000015 ± 0.000005
2013-05-20 09:24:00	0.00023 ± 0.00003	0.00044 ± 0.00005
2013-05-23 10:31:00	0.00016 ± 0.00002	0.0003 ± 0.00004
2013-05-27 09:21:00	0.00046 ± 0.00005	0.0009 ± 0.0001
2013-05-31 09:18:00	0.000036 ± 0.000009	0.00007 ± 0.00001
2013-06-03 10:03:00	0.00008 ± 0.00001	0.00018 ± 0.00002
2013-06-06 10:18:00	0.00018 ± 0.00002	0.00038 ± 0.00005
2013-06-10 09:16:00	0.000041 ± 0.000007	0.00008 ± 0.00001
2013-06-13 15:25:00	0.000033 ± 0.000007	0.000062 ± 0.00001
2013-06-17 09:23:00	0.000026 ± 0.000006	0.000039 ± 0.000007
2013-06-20 10:04:00	0.000019 ± 0.000005	0.00005 ± 0.000009
2013-06-24 09:14:00	0.000036 ± 0.000006	0.000064 ± 0.00001
2013-06-27 09:41:00	0.000022 ± 0.000005	0.000046 ± 0.000008
2013-06-30 17:38:00	0.00008 ± 0.00001	0.00017 ± 0.00002
2013-07-04 09:16:00	0.000031 ± 0.000006	0.000055 ± 0.000009
2013-07-07 10:14:00	0.000027 ± 0.000005	0.000062 ± 0.000009
2013-07-10 12:25:00	0.000063 ± 0.000008	0.00013 ± 0.00002
2013-07-13 17:52:00	0.000019 ± 0.000005	0.000036 ± 0.000007
2013-07-16 18:03:00	0.000018 ± 0.000005	0.000039 ± 0.000007
2013-07-19 19:58:00	0.000021 ± 0.000004	0.000045 ± 0.000007
2013-07-23 10:33:00	0.000034 ± 0.000006	0.00007 ± 0.00001
2013-07-26 11:18:00	0.000029 ± 0.000005	0.000069 ± 0.00001
2013-07-29 12:53:00	0.000028 ± 0.000006	0.000043 ± 0.000008
2013-08-02 09:17:00	0.000031 ± 0.000007	0.00006 ± 0.00001
2013-08-05 09:23:00	0.000021 ± 0.000005	0.000055 ± 0.000009
2013-08-08 09:32:00	0.00008 ± 0.00001	0.0002 ± 0.00003
2013-08-12 09:15:00	0.000017 ± 0.000005	0.000042 ± 0.000008
2013-08-15 09:40:00	0.000021 ± 0.000005	0.000029 ± 0.000005
2013-08-19 09:23:00	0.0001 ± 0.00001	0.00024 ± 0.00003
2013-08-22 10:10:00	0.000019 ± 0.000005	0.000046 ± 0.000008
2013-08-25 16:42:00	0.000013 ± 0.000006	0.000035 ± 0.000007
2013-08-29 13:53:00	0.000015 ± 0.000006	0.000026 ± 0.000007
2013-09-01 14:50:00	0.000033 ± 0.000007	0.00008 ± 0.00001
2013-09-05 09:14:00	0.00007 ± 0.00001	0.00019 ± 0.00002
2013-09-08 14:54:00	0.000031 ± 0.000007	0.000048 ± 0.000009
2013-09-11 16:49:00	0.00002 ± 0.000007	0.000028 ± 0.000008
2013-09-14 17:00:00	ND	0.000026 ± 0.000007
2013-09-17 18:36:00	ND	0.000034 ± 0.000009
2013-09-21 10:40:00	0.000014 ± 0.000006	0.00005 ± 0.000009
2013-09-25 08:41:00	ND	0.000019 ± 0.000008
2013-09-28 16:24:00	0.00025 ± 0.00003	0.00064 ± 0.00008
2013-10-01 19:42:00	0.000012 ± 0.000005	0.000022 ± 0.000007
2013-10-05 10:59:00	0.000011 ± 0.000006	0.000025 ± 0.000007
2013-10-08 12:17:00	0.000037 ± 0.000009	0.0001 ± 0.00002
2013-10-12 10:14:00	0.000011 ± 0.000006	0.000017 ± 0.000007
2013-10-15 17:58:00	0.000025 ± 0.000007	0.000052 ± 0.00001
2013-10-19 13:59:00	ND	ND
2013-10-23 09:15:00	0.000009 ± 0.000003	0.000011 ± 0.000004
2013-10-26 09:37:00	0.000011 ± 0.000006	0.000022 ± 0.000007
2013-10-29 09:45:00	0.000036 ± 0.000007	0.000063 ± 0.000009
2013-11-01 10:15:00	0.000038 ± 0.000007	0.00007 ± 0.00001
2013-11-04 11:05:00	0.000013 ± 0.000003	0.000029 ± 0.000004
2013-11-07 11:24:00	0.000013 ± 0.000003	0.000031 ± 0.000005
2013-11-11 09:10:00	0.00002 ± 0.000006	0.000043 ± 0.00001
2013-11-15 09:50:00	0.000022 ± 0.000005	0.000035 ± 0.000006
2013-11-18 11:54:00	0.00002 ± 0.000005	0.000056 ± 0.000007
2013-11-22 08:43:00	0.000036 ± 0.000006	0.000067 ± 0.000009
2013-11-27 09:10:00	0.00007 ± 0.00001	0.0002 ± 0.00002
2013-11-30 10:11:00	0.000014 ± 0.000004	0.000037 ± 0.000006
2013-12-03 15:10:00	0.000015 ± 0.000005	0.00006 ± 0.00001
2013-12-06 17:37:00	0.000006 ± 0.000002	0.000021 ± 0.000003
2013-12-09 17:47:00	0.000101 ± 0.000015	0.00026 ± 0.00003
2013-12-13 17:58:00	0.000028 ± 0.000021	0.0001 ± 0.00004
2013-12-16 18:55:00	0.000026 ± 0.000005	0.000058 ± 0.000008
2013-12-20 10:42:00	0.000007 ± 0.000002	0.000018 ± 0.000003
2013-12-24 09:12:00	0.00011 ± 0.00002	0.00029 ± 0.00003
2013-12-27 12:58:00	0.00007 ± 0.00001	0.00016 ± 0.00002
2013-12-30 16:27:00	0.000011 ± 0.000003	0.000026 ± 0.000004
2014-01-03 09:09:00	0.000012 ± 0.000002	0.000015 ± 0.000002
2014-01-06 09:50:00	0.00006 ± 0.00001	0.00013 ± 0.00002
2014-01-09 11:33:00	0.00007 ± 0.00001	0.00017 ± 0.00002
2014-01-12 15:37:00	0.000021 ± 0.000004	0.000045 ± 0.000006
2014-01-16 09:19:00	0.000041 ± 0.000007	0.000084 ± 0.00001
2014-01-19 12:18:00	0.00003 ± 0.000006	0.000077 ± 0.00001
2014-01-22 16:05:00	0.000058 ± 0.000009	0.0001 ± 0.00001
2014-01-26 10:15:00	0.0001 ± 0.00001	0.00021 ± 0.00002
2014-01-30 09:15:00	0.00007 ± 0.00001	0.00014 ± 0.00002
2014-02-03 09:20:00	0.00012 ± 0.00002	0.00027 ± 0.00003
2014-02-07 09:13:00	0.000025 ± 0.000004	0.00005 ± 0.000006
2014-02-10 09:25:00	0.000037 ± 0.000006	0.000067 ± 0.000008
2014-02-13 11:25:00	0.000017 ± 0.000003	0.000029 ± 0.000004
2014-02-17 11:20:00	0.000011 ± 0.000002	0.000023 ± 0.000003
2014-02-20 12:00:00	0.000009 ± 0.000002	0.000017 ± 0.000003
2014-02-24 09:25:00	0.00002 ± 0.000005	0.000035 ± 0.000005
2014-02-27 09:40:00	0.000023 ± 0.000004	0.000043 ± 0.000005
2014-03-03 09:39:00	0.0002 ± 0.00003	0.00043 ± 0.00005
2014-03-06 10:47:00	0.00015 ± 0.00002	0.00032 ± 0.00003
2014-03-10 09:25:00	0.0002 ± 0.00003	0.00042 ± 0.00005
2014-03-13 09:50:00	0.000037 ± 0.000006	0.000081 ± 0.000009
2014-03-17 09:23:00	0.000044 ± 0.000007	0.00011 ± 0.00001
2014-03-20 09:37:00	0.00007 ± 0.00001	0.00017 ± 0.00002
2014-03-23 10:27:00	0.00017 ± 0.00002	0.00038 ± 0.00004
2014-03-26 12:34:00	0.000017 ± 0.000004	0.00004 ± 0.000005
2014-03-30 14:12:00	0.000023 ± 0.000004	0.00006 ± 0.000007
2014-04-03 11:00:00	0.000011 ± 0.000003	0.000021 ± 0.000004
2014-04-07 13:30:00	0.000017 ± 0.000003	0.00004 ± 0.000005
2014-04-11 18:58:00	0.000011 ± 0.000002	0.00002 ± 0.000003
2014-04-15 09:12:00	0.000065 ± 0.00001	0.00015 ± 0.00002
2014-04-18 19:07:00	0.00002 ± 0.000004	0.000038 ± 0.000005
2014-04-22 09:18:00	0.00002 ± 0.000004	0.000051 ± 0.000006
2014-04-25 09:40:00	0.000017 ± 0.000003	0.000033 ± 0.000004
2014-04-29 14:00:00	0.000006 ± 0.000002	0.000014 ± 0.000002
2014-05-02 16:07:00	0.00003 ± 0.000005	0.000069 ± 0.000008
2014-05-06 14:05:00	0.000059 ± 0.00001	0.00015 ± 0.00002
2014-05-09 14:54:00	0.0001 ± 0.00002	0.00025 ± 0.00003
2014-05-12 17:29:00	0.000026 ± 0.000004	0.000055 ± 0.000006
2014-05-16 09:15:00	0.000016 ± 0.000004	0.000037 ± 0.000005
2014-05-19 09:23:00	0.000013 ± 0.000003	0.000032 ± 0.000004
2014-05-24 09:15:00	0.000009 ± 0.000002	0.000026 ± 0.000004
2014-05-27 09:25:00	0.000029 ± 0.000006	0.000072 ± 0.000009
2014-05-30 13:13:00	0.00011 ± 0.00002	0.00023 ± 0.00003
2014-06-02 19:15:00	0.000022 ± 0.000004	0.000053 ± 0.000007
2014-06-05 19:58:00	0.000023 ± 0.000004	0.000053 ± 0.000006
2014-06-09 09:12:00	0.00001 ± 0.000002	0.000021 ± 0.000003
2014-06-12 14:44:00	0.000022 ± 0.000004	0.000054 ± 0.000006
2014-06-16 09:12:00	0.000009 ± 0.000002	0.000027 ± 0.000003
2014-06-19 18:15:00	0.000013 ± 0.000003	0.000023 ± 0.000003
2014-06-23 09:15:00	0.000004 ± 0.000002	0.000018 ± 0.000003
2014-06-26 10:52:00	0.000058 ± 0.000009	0.00014 ± 0.00002
2014-06-29 11:01:00	0.000012 ± 0.000003	0.000029 ± 0.000004
2014-07-02 11:15:00	0.00002 ± 0.000004	0.000038 ± 0.000005
2014-07-05 14:00:00	0.000016 ± 0.000003	0.000049 ± 0.000006
2014-07-08 14:08:00	0.000004 ± 0.000002	0.000013 ± 0.000002
2014-07-11 18:02:00	0.000008 ± 0.000002	0.000021 ± 0.000003
2014-07-14 18:50:00	ND	0.00002 ± 0.000003
2014-07-18 09:29:00	0.000007 ± 0.000003	0.000018 ± 0.000003
2014-07-21 14:10:00	0.00001 ± 0.000002	0.000029 ± 0.000004
2014-07-24 17:02:00	0.000031 ± 0.000006	0.000075 ± 0.000009
2014-07-28 09:13:00	0.000015 ± 0.000003	0.000032 ± 0.000004
2014-08-02 09:23:00	0.000012 ± 0.000003	0.000028 ± 0.000004
2014-08-05 09:32:00	0.000015 ± 0.000003	0.000038 ± 0.000005
2014-08-08 10:09:00	0.000024 ± 0.000005	0.000058 ± 0.000007
2014-08-11 16:09:00	0.000008 ± 0.000002	0.000016 ± 0.000003
2014-08-15 09:09:00	0.000008 ± 0.000002	0.000018 ± 0.000002
2014-08-18 09:19:00	0.00001 ± 0.000002	0.000021 ± 0.000003
2014-08-21 16:00:00	0.000006 ± 0.000002	0.00002 ± 0.000003
2014-08-25 10:41:00	0.00001 ± 0.000002	0.000021 ± 0.000003
2014-08-28 18:40:00	0.000015 ± 0.000003	0.000038 ± 0.000005
2014-09-01 15:35:00	0.000012 ± 0.000003	0.000036 ± 0.000004
2014-09-04 16:47:00	0.000008 ± 0.000002	0.000017 ± 0.000003
2014-09-08 10:31:00	0.000018 ± 0.000003	0.000037 ± 0.000005
2014-09-11 10:42:00	0.000014 ± 0.000003	0.000032 ± 0.000004
2014-09-15 15:35:00	0.000007 ± 0.000002	0.000022 ± 0.000003
2014-09-18 20:05:00	0.000008 ± 0.000002	0.000018 ± 0.000003
2014-09-22 09:16:00	0.000007 ± 0.000002	0.000029 ± 0.000004
2014-09-26 09:26:00	0.000009 ± 0.000002	0.000023 ± 0.000003
2014-09-29 10:37:00	0.000008 ± 0.000002	0.000024 ± 0.000003
2014-10-02 12:42:00	0.00001 ± 0.000003	0.000022 ± 0.000003
2014-10-05 16:37:00	ND	0.000021 ± 0.000004
2014-10-10 09:45:00	0.000007 ± 0.000002	0.000016 ± 0.000003
2014-10-14 09:12:00	0.000007 ± 0.000002	0.000016 ± 0.000003
2014-10-17 09:37:00	0.000005 ± 0.000002	0.000014 ± 0.000002
2014-10-20 11:02:00	ND	0.000012 ± 0.000002
2014-10-24 16:43:00	0.000009 ± 0.000002	0.000027 ± 0.000003
2014-10-27 16:58:00	0.000012 ± 0.000003	0.000038 ± 0.000005
2014-10-30 18:00:00	0.000011 ± 0.000002	0.000022 ± 0.000003
2014-11-04 09:16:00	0.000008 ± 0.000003	0.000036 ± 0.000005
2014-11-07 15:10:00	0.000008 ± 0.000002	0.000018 ± 0.000003
2014-11-10 15:55:00	0.000016 ± 0.000003	0.000049 ± 0.000006
2014-11-13 16:21:00	0.000004 ± 0.000002	0.000012 ± 0.000002
2014-11-17 09:14:00	0.000007 ± 0.000002	0.000018 ± 0.000003
2014-11-20 09:45:00	0.000011 ± 0.000003	0.000037 ± 0.000004
2014-11-23 17:42:00	0.000016 ± 0.000003	0.000048 ± 0.000006
2014-11-27 10:07:00	0.000005 ± 0.000002	0.000016 ± 0.000002
2014-12-01 09:14:00	0.000016 ± 0.000003	0.000042 ± 0.000005
2014-12-04 11:12:00	0.000008 ± 0.000002	0.000017 ± 0.000003
2014-12-08 09:11:00	0.000015 ± 0.000003	0.000044 ± 0.000005
2014-12-11 09:38:00	0.000007 ± 0.000002	0.000022 ± 0.000003
2014-12-15 09:13:00	0.000016 ± 0.000003	0.000045 ± 0.000005
2014-12-18 09:52:00	0.000008 ± 0.000002	0.00002 ± 0.000003
2014-12-22 09:17:00	0.00001 ± 0.000002	0.000019 ± 0.000003
2014-12-25 09:51:00	0.00001 ± 0.000002	0.000025 ± 0.000003
2014-12-28 10:12:00	0.000032 ± 0.000006	0.0001 ± 0.00001
2014-12-31 11:50:00	0.000032 ± 0.000006	0.00009 ± 0.00001
2015-01-03 15:54:00	0.000012 ± 0.000003	0.000029 ± 0.000004
2015-01-06 16:01:00	0.000025 ± 0.000004	0.000076 ± 0.000009
2015-01-09 18:28:00	0.000013 ± 0.000003	0.000036 ± 0.000005
2015-01-13 09:16:00	0.000018 ± 0.000004	0.000056 ± 0.000007
2015-01-16 09:56:00	0.000036 ± 0.000006	0.00009 ± 0.00001
2015-01-19 11:08:00	0.000044 ± 0.000007	0.00012 ± 0.00001
2015-01-22 11:20:00	0.000048 ± 0.000008	0.00015 ± 0.00002
2015-01-26 09:13:00	0.000035 ± 0.000006	0.0001 ± 0.00001
2015-01-29 11:47:00	0.000031 ± 0.000006	0.00009 ± 0.00001
2015-02-02 09:14:00	0.000006 ± 0.000002	0.000032 ± 0.000004
2015-02-05 11:15:00	0.00007 ± 0.00001	0.00023 ± 0.00003
2015-02-08 14:25:00	0.000064 ± 0.00001	0.000166 ± 0.000019
2015-02-11 16:43:00	0.000021 ± 0.000004	0.00006 ± 0.000007
2015-02-16 09:10:00	0.000006 ± 0.000002	0.000026 ± 0.000003
2015-02-20 09:18:00	0.000015 ± 0.000003	0.000051 ± 0.000006
2015-02-23 11:12:00	0.00001 ± 0.000002	0.000027 ± 0.000004
2015-02-26 12:00:00	0.000041 ± 0.000006	0.000124 ± 0.000015
2015-03-01 12:14:00	0.000017 ± 0.000003	0.000048 ± 0.000006
2015-03-05 09:28:00	0.000036 ± 0.000006	0.00011 ± 0.00001
2015-03-09 09:15:00	0.000025 ± 0.000005	0.00009 ± 0.00001
2015-03-12 09:35:00	0.000006 ± 0.000002	0.000019 ± 0.000003
2015-03-16 09:12:00	0.000016 ± 0.000003	0.000052 ± 0.000007
2015-03-19 09:26:00	0.000004 ± 0.000002	0.000022 ± 0.000003
2015-03-23 09:15:00	0.000037 ± 0.000006	0.00012 ± 0.00002
2015-03-26 09:28:00	0.000008 ± 0.000002	0.000034 ± 0.000004
2015-03-29 10:12:00	0.000016 ± 0.000003	0.000057 ± 0.000008
2015-04-01 12:07:00	0.000047 ± 0.000006	0.00015 ± 0.00002
2015-04-06 09:12:00	0.000005 ± 0.000002	0.000015 ± 0.000002
2015-04-09 12:19:00	0.000006 ± 0.000002	0.00002 ± 0.000003
2015-04-13 09:13:00	0.000004 ± 0.000002	0.000013 ± 0.000002
2015-04-16 09:27:00	ND	0.000016 ± 0.000003
2015-04-20 09:09:00	0.000005 ± 0.000002	0.000015 ± 0.000003
2015-04-23 10:02:00	0.000023 ± 0.000004	0.000065 ± 0.000009
2015-04-27 09:21:00	0.000014 ± 0.000003	0.000039 ± 0.000006
2015-04-30 09:46:00	0.000008 ± 0.000003	0.000036 ± 0.000005
2015-05-03 15:33:00	0.000011 ± 0.000003	0.000038 ± 0.000005
2015-05-07 11:12:00	0.000008 ± 0.000002	0.000028 ± 0.000004
2015-05-11 09:15:00	0.000024 ± 0.000004	0.00009 ± 0.00001
2015-05-14 17:35:00	0.000032 ± 0.000004	0.0001 ± 0.00001
2015-05-18 09:11:00	0.000006 ± 0.000002	0.000018 ± 0.000003
2015-05-21 09:43:00	0.000057 ± 0.000008	0.0002 ± 0.00003
2015-05-25 09:10:00	0.000016 ± 0.000003	0.000049 ± 0.000006
2015-05-28 09:57:00	0.000006 ± 0.000002	0.000027 ± 0.000004
2015-06-01 09:13:00	0.000021 ± 0.000004	0.000065 ± 0.000008
2015-06-04 14:26:00	0.000013 ± 0.000002	0.000051 ± 0.000006
2015-06-08 09:18:00	0.000008 ± 0.000002	0.000029 ± 0.000004
2015-06-11 10:12:00	0.000006 ± 0.000002	0.000016 ± 0.000002
2015-06-15 09:16:00	0.000007 ± 0.000002	0.000019 ± 0.000003
2015-06-18 17:46:00	0.00001 ± 0.000002	0.00002 ± 0.000003
2015-06-22 09:16:00	0.000007 ± 0.000002	0.000024 ± 0.000003
2015-06-25 13:23:00	0.000005 ± 0.000002	0.000014 ± 0.000002
2015-06-29 09:13:00	0.000005 ± 0.000002	0.000015 ± 0.000002
2015-07-02 09:41:00	0.000006 ± 0.000002	0.00002 ± 0.000003
2015-07-06 09:10:00	0.000011 ± 0.000002	0.000029 ± 0.000004
2015-07-09 11:12:00	0.000003 ± 0.000002	0.000019 ± 0.000003
2015-07-13 09:14:00	0.000012 ± 0.000003	0.000044 ± 0.000006
2015-07-16 09:25:00	0.000002 ± 0.000001	0.000009 ± 0.000002
2015-07-19 17:50:00	0.000006 ± 0.000002	0.000021 ± 0.000003
2015-07-22 18:34:00	0.000007 ± 0.000002	0.000024 ± 0.000003
2015-07-26 09:26:00	0.000007 ± 0.000002	0.00002 ± 0.000003
2015-07-29 09:43:00	0.000007 ± 0.000002	0.000044 ± 0.000006
2015-08-01 15:33:00	ND	0.000015 ± 0.000002
2015-08-04 15:43:00	0.000005 ± 0.000002	0.000017 ± 0.000002
2015-08-07 15:52:00	0.000021 ± 0.000005	0.00009 ± 0.00001
2015-08-10 17:31:00	0.000006 ± 0.000002	0.000022 ± 0.000003
2015-08-14 11:43:00	0.000005 ± 0.000002	0.000025 ± 0.000003
2015-08-17 12:08:00	0.000005 ± 0.000002	0.000016 ± 0.000002
2015-08-20 19:02:00	0.000005 ± 0.000002	0.000019 ± 0.000003
2015-08-24 09:11:00	0.000007 ± 0.000002	0.000012 ± 0.000002
2015-08-27 09:40:00	0.000005 ± 0.000002	0.000015 ± 0.000002
2015-08-31 09:18:00	ND	0.000016 ± 0.000003
2015-09-03 09:50:00	ND	0.000025 ± 0.000004
2015-09-07 10:48:00	ND	0.000006 ± 0.000002
2015-09-10 11:58:00	ND	0.000016 ± 0.000003
2015-09-13 15:28:00	ND	0.00004 ± 0.000007
2015-09-16 15:44:00	0.000014 ± 0.000004	0.000029 ± 0.000005
2015-09-19 16:49:00	0.000008 ± 0.000002	0.000022 ± 0.000003
2015-09-22 17:00:00	0.000018 ± 0.000004	0.000034 ± 0.000005
2015-09-25 18:05:00	ND	0.000015 ± 0.000003
2015-09-28 18:10:00	0.000005 ± 0.000002	0.000016 ± 0.000003
2015-10-02 10:14:00	0.000007 ± 0.000003	0.000009 ± 0.000002
2015-10-05 10:20:00	ND	0.000019 ± 0.000003
2015-10-08 13:41:00	0.000006 ± 0.000002	0.000017 ± 0.000003
2015-10-11 14:49:00	0.000016 ± 0.000005	0.000074 ± 0.00001
2015-10-15 09:18:00	ND	0.000017 ± 0.000003
2015-10-19 09:15:00	0.000007 ± 0.000003	0.000017 ± 0.000003
2015-10-22 09:40:00	0.000007 ± 0.000002	0.000031 ± 0.000004
2015-10-26 09:15:00	0.000006 ± 0.000002	0.000017 ± 0.000003
2015-10-29 09:54:00	0.000033 ± 0.000006	0.00014 ± 0.00002
2015-11-02 09:25:00	0.000005 ± 0.000002	0.000016 ± 0.000003
2015-11-05 12:02:00	0.000007 ± 0.000002	0.000014 ± 0.000003
2015-11-09 09:18:00	ND	0.000012 ± 0.000002
2015-11-12 10:06:00	0.000007 ± 0.000002	0.000013 ± 0.000002
2015-11-16 09:17:00	ND	0.000016 ± 0.000003
2015-11-19 11:26:00	0.000005 ± 0.000002	0.000019 ± 0.000003
2015-11-23 14:50:00	0.000015 ± 0.000003	0.000056 ± 0.000007
2015-11-27 11:40:00	0.000021 ± 0.000004	0.000077 ± 0.00001
2015-11-30 12:06:00	0.000007 ± 0.000002	0.000014 ± 0.000002
2015-12-03 17:13:00	0.000008 ± 0.000003	0.000032 ± 0.000005
2015-12-07 09:22:00	0.000009 ± 0.000002	0.000022 ± 0.000003
2015-12-10 09:31:00	0.000005 ± 0.000003	0.000022 ± 0.000004
2015-12-14 09:18:00	0.000005 ± 0.000002	0.000021 ± 0.000003
2015-12-17 13:44:00	0.000006 ± 0.000002	0.000019 ± 0.000003
2015-12-21 09:18:00	0.000007 ± 0.000002	0.000018 ± 0.000003
2015-12-24 09:45:00	ND	0.000015 ± 0.000003
2015-12-28 09:15:00	0.000005 ± 0.000002	0.000013 ± 0.000002
2015-12-31 10:36:00	0.000021 ± 0.000004	0.000072 ± 0.000009
2016-01-04 09:18:00	0.000024 ± 0.000005	0.000104 ± 0.000013
2016-01-07 09:43:00	0.00004 ± 0.000006	0.00017 ± 0.000021
2016-01-10 14:15:00	0.000006 ± 0.000002	0.000015 ± 0.000003
2016-01-14 09:36:00	0.000007 ± 0.000002	0.000023 ± 0.000003
2016-01-18 09:16:00	0.000008 ± 0.000002	0.000032 ± 0.000004
2016-01-21 10:38:00	0.000005 ± 0.000001	0.000017 ± 0.000002
2016-01-25 09:21:00	ND	0.00002 ± 0.000003
2016-01-28 09:52:00	0.000004 ± 0.000001	0.000014 ± 0.000002
2016-02-01 09:14:00	0.000008 ± 0.000002	0.00002 ± 0.000003
2016-02-04 10:07:00	0.000007 ± 0.000002	0.000034 ± 0.000004
2016-02-08 09:20:00	0.000045 ± 0.000006	0.0002 ± 0.00002
2016-02-12 09:12:00	0.000035 ± 0.000005	0.00017 ± 0.00002
2016-02-15 09:22:00	0.000009 ± 0.000002	0.000035 ± 0.000005
2016-02-18 10:22:00	0.000007 ± 0.000002	0.000022 ± 0.000003
2016-02-22 09:17:00	0.000015 ± 0.000003	0.00005 ± 0.000006
2016-02-25 09:26:00	0.000006 ± 0.000002	0.000027 ± 0.000004
2016-02-29 09:14:00	0.000006 ± 0.000002	0.000025 ± 0.000004
2016-03-04 09:10:00	0.00001 ± 0.000002	0.000031 ± 0.000004
2016-03-07 09:18:00	ND	0.000017 ± 0.000002
2016-03-10 09:30:00	ND	0.000013 ± 0.000002
2016-03-14 09:17:00	ND	0.000011 ± 0.000002
2016-03-18 09:15:00	ND	0.000015 ± 0.000003
2016-03-21 09:53:00	ND	0.000011 ± 0.000002
2016-03-24 11:02:00	ND	0.00001 ± 0.000002
2016-03-27 13:55:00	0.000015 ± 0.000003	0.000072 ± 0.000009
2016-03-31 11:38:00	0.000014 ± 0.000003	0.000065 ± 0.000008
2016-04-04 09:08:00	ND	0.00001 ± 0.000002
2016-04-07 10:25:00	0.00004 ± 0.000006	0.00018 ± 0.00002
2016-04-11 09:12:00	0.000009 ± 0.000002	0.000045 ± 0.000006
2016-04-14 09:31:00	0.000015 ± 0.000004	0.000073 ± 0.00001
2016-04-18 09:05:00	0.000007 ± 0.000002	0.000016 ± 0.000003
2016-04-21 16:56:00	ND	0.000011 ± 0.000002
2016-04-25 09:08:00	0.000006 ± 0.000002	0.000024 ± 0.000003
2016-04-28 10:10:00	ND	0.000012 ± 0.000002
2016-05-02 09:10:00	ND	0.000026 ± 0.000004
2016-05-06 09:12:00	0.000009 ± 0.000002	0.000045 ± 0.000006
2016-05-09 09:23:00	0.000006 ± 0.000002	0.000032 ± 0.000004
2016-05-12 09:30:00	ND	0.000016 ± 0.000003
2016-05-16 10:10:00	ND	0.000012 ± 0.000002
2016-05-21 18:55:00	0.000004 ± 0.000001	0.000016 ± 0.000002
2016-05-25 09:08:00	0.000022 ± 0.000003	0.00009 ± 0.00001
2016-05-28 10:15:00	ND	0.000011 ± 0.000002
2016-05-31 12:08:00	0.000016 ± 0.000003	0.00009 ± 0.00001
2016-06-03 13:08:00	ND	0.000008 ± 0.000002
2016-06-06 14:56:00	0.000007 ± 0.000002	0.000046 ± 0.000006
2016-06-09 15:37:00	0.000007 ± 0.000001	0.000029 ± 0.000004
2016-06-13 09:12:00	0.000007 ± 0.000002	0.000018 ± 0.000004
2016-06-16 18:57:00	ND	0.00001 ± 0.000002
2016-06-20 09:08:00	0.000005 ± 0.000001	0.000018 ± 0.000003
2016-06-23 12:38:00	0.000004 ± 0.000001	0.000011 ± 0.000002
2016-06-27 09:08:00	ND	0.000015 ± 0.000002
2016-06-30 09:48:00	ND	0.000008 ± 0.000002
2016-07-04 09:10:00	ND	0.000009 ± 0.000002
2016-07-07 09:26:00	ND	0.000014 ± 0.000002
2016-07-12 09:15:00	ND	0.000015 ± 0.000003
2016-07-15 12:08:00	0.000008 ± 0.000002	0.000024 ± 0.000004
2016-07-18 16:26:00	ND	0.000012 ± 0.000003
2016-07-21 17:28:00	ND	0.000009 ± 0.000002
2016-07-25 09:23:00	0.000006 ± 0.000002	0.000016 ± 0.000003
2016-07-28 09:43:00	0.000007 ± 0.000002	0.00002 ± 0.000003
2016-08-01 09:11:00	ND	0.000013 ± 0.000002
2016-08-04 09:47:00	0.000004 ± 0.000002	0.000014 ± 0.000002
2016-08-08 09:15:00	ND	0.000007 ± 0.000002
2016-08-12 09:10:00	0.000006 ± 0.000002	0.000022 ± 0.000003
2016-08-15 10:18:00	0.000004 ± 0.000001	0.000021 ± 0.000003
2016-08-19 09:09:00	0.000004 ± 0.000002	0.000013 ± 0.000002
2016-08-22 09:42:00	ND	0.000014 ± 0.000003
2016-08-25 10:26:00	ND	0.000008 ± 0.000002
2016-08-29 09:09:00	ND	0.000012 ± 0.000002
2016-09-01 09:22:00	0.000003 ± 0.000001	0.000016 ± 0.000002
2016-09-05 09:10:00	ND	0.000014 ± 0.000002
2016-09-10 18:12:00	ND	0.000009 ± 0.000002
2016-09-13 18:16:00	ND	0.000011 ± 0.000002
2016-09-16 18:22:00	ND	0.000011 ± 0.000002
2016-09-20 09:28:00	ND	0.000006 ± 0.000002
2016-09-23 10:13:00	ND	0.000019 ± 0.000003
2016-09-26 10:25:00	ND	0.000018 ± 0.000003
2016-09-29 10:55:00	ND	0.000011 ± 0.000002
2016-10-03 09:11:00	ND	0.000009 ± 0.000002
2016-10-06 09:45:00	ND	0.000008 ± 0.000002
2016-10-09 16:54:00	ND	0.000017 ± 0.000003
2016-10-13 09:07:00	0.000006 ± 0.000002	0.000016 ± 0.000003
2016-10-17 09:18:00	ND	0.000017 ± 0.000003
2016-10-20 11:25:00	0.000008 ± 0.000002	0.000022 ± 0.000003
2016-10-25 09:11:00	ND	0.000016 ± 0.000003
2016-10-31 09:09:00	0.000006 ± 0.000002	0.000018 ± 0.000003
2016-11-04 09:12:00	0.000007 ± 0.000002	0.000026 ± 0.000004
2016-11-07 09:20:00	0.000004 ± 0.000002	0.000018 ± 0.000003
2016-11-10 09:50:00	ND	0.000015 ± 0.000003
2016-11-14 09:11:00	ND	0.000006 ± 0.000003
2016-11-17 10:15:00	ND	0.000013 ± 0.000003
2016-11-21 09:02:00	ND	0.000005 ± 0.000003
2016-11-24 09:11:00	ND	0.00001 ± 0.000003
2016-11-28 12:48:00	ND	0.000007 ± 0.000003
2016-12-02 09:14:00	ND	0.000007 ± 0.000003
2016-12-05 09:20:00	ND	0.000007 ± 0.000003
2016-12-08 09:50:00	ND	0.000008 ± 0.000003
2016-12-12 09:15:00	ND	0.000018 ± 0.000003
2016-12-15 09:37:00	0.000008 ± 0.000002	0.00005 ± 0.000009
2016-12-18 10:05:00	ND	0.000017 ± 0.000004
2016-12-21 13:37:00	0.00001 ± 0.000003	0.000018 ± 0.000003
2016-12-24 14:32:00	0.000004 ± 0.000002	0.000013 ± 0.000002
2016-12-28 09:22:00	0.000006 ± 0.000002	0.000019 ± 0.000003
2016-12-31 14:42:00	0.000006 ± 0.000003	0.000014 ± 0.000003
2017-01-04 10:25:00	0.000004 ± 0.000003	0.000033 ± 0.000005
2017-01-07 16:59:00	ND	0.000029 ± 0.000005
2017-01-11 09:10:00	0.000006 ± 0.000003	0.000013 ± 0.000003
2017-01-16 09:22:00	ND	0.000009 ± 0.000003
2017-01-19 09:29:00	ND	0.000011 ± 0.000002
2017-01-23 09:12:00	0.000007 ± 0.000003	0.000024 ± 0.000005
2017-01-26 09:45:00	0.000006 ± 0.000002	0.000015 ± 0.000003
2017-01-30 09:08:00	0.000008 ± 0.000002	0.000035 ± 0.000006
2017-02-02 09:36:00	0.000005 ± 0.000002	0.000015 ± 0.000003
2017-02-06 09:14:00	0.000014 ± 0.000003	0.000071 ± 0.000009
2017-02-09 14:57:00	0.000014 ± 0.000003	0.00007 ± 0.00001
2017-02-13 09:20:00	ND	0.000024 ± 0.000005
2017-02-16 15:50:00	0.000013 ± 0.000003	0.000044 ± 0.000008
2017-02-20 09:11:00	0.00001 ± 0.000003	0.000042 ± 0.000008
2017-02-23 09:20:00	0.000006 ± 0.000003	0.000015 ± 0.000004
2017-02-27 09:09:00	0.000005 ± 0.000002	0.000025 ± 0.000005
2017-03-02 09:32:00	0.000009 ± 0.000003	0.000046 ± 0.000008
2017-03-06 09:13:00	0.000006 ± 0.000002	0.000031 ± 0.000005
2017-03-09 09:30:00	0.000006 ± 0.000002	0.000019 ± 0.000004
2017-03-13 09:09:00	0.000007 ± 0.000003	0.000019 ± 0.000004
2017-03-16 10:28:00	ND	0.000024 ± 0.000005
2017-03-19 15:54:00	ND	0.000021 ± 0.000004
2017-03-23 09:10:00	0.000022 ± 0.000005	0.00008 ± 0.00001
2017-03-27 15:39:00	0.000005 ± 0.000005	0.000016 ± 0.000005
2017-03-31 09:10:00	ND	0.000007 ± 0.000005
2017-04-04 09:12:00	ND	0.000019 ± 0.000003
2017-04-07 09:35:00	0.000007 ± 0.000003	0.000031 ± 0.000006
2017-04-10 10:07:00	ND	0.000016 ± 0.000004
2017-04-13 10:28:00	0.000005 ± 0.000002	0.000021 ± 0.000004
2017-04-17 09:15:00	ND	0.000038 ± 0.000007
2017-04-20 09:23:00	0.000006 ± 0.000002	0.000023 ± 0.000004
2017-04-24 09:16:00	0.000007 ± 0.000002	0.000039 ± 0.000007
2017-05-01 09:47:00	0.000006 ± 0.000002	0.000022 ± 0.000004
2017-05-08 09:50:00	0.000004 ± 0.000001	0.000017 ± 0.000002
2017-05-15 09:15:00	0.000003 ± 0.000001	0.000018 ± 0.000003
2017-05-22 11:02:00	ND	0.000013 ± 0.000002
2017-05-29 09:10:00	0.000002 ± 0.0000009	0.000012 ± 0.000002
2017-06-05 09:14:00	ND	0.000015 ± 0.000003
2017-06-12 09:30:00	0.000002 ± 0.000001	0.000014 ± 0.000003
2017-06-17 14:01:00	0.0000027 ± 0.0000009	0.000015 ± 0.000003
2017-06-23 11:21:00	ND	0.000016 ± 0.000003
2017-06-30 09:16:00	ND	0.000008 ± 0.000002
2017-07-06 17:01:00	0.000003 ± 0.000001	0.000011 ± 0.000002
2017-07-13 09:41:00	ND	0.000011 ± 0.000002
2017-07-20 14:39:00	0.0000036 ± 0.0000009	0.00001 ± 0.000001
2017-07-27 10:05:00	ND	0.000011 ± 0.000002
2017-08-03 10:26:00	0.000003 ± 0.000001	0.000016 ± 0.000003
2017-08-10 10:55:00	0.000002 ± 0.000001	0.000008 ± 0.000001
2017-08-17 11:27:00	0.000004 ± 0.000001	0.000012 ± 0.000002
2017-08-24 11:08:00	ND	0.000008 ± 0.000001
2017-08-31 16:00:00	0.000002 ± 0.000001	0.00001 ± 0.000001
2017-09-09 11:03:00	0.000003 ± 0.0000009	0.000011 ± 0.000002
2017-09-16 15:19:00	0.000005 ± 0.000001	0.000031 ± 0.000005
2017-09-23 12:04:00	0.000003 ± 0.000001	0.00001 ± 0.000002
2017-10-01 14:55:00	0.000003 ± 0.000002	0.000009 ± 0.000002
2017-10-06 16:54:00	0.0000016 ± 0.0000007	0.000012 ± 0.000002
2017-10-16 14:00:00	0.000003 ± 0.000001	0.000006 ± 0.000001
2017-10-23 11:30:00	ND	0.000012 ± 0.000002
2017-10-28 10:59:00	0.0000015 ± 0.0000005	0.000008 ± 0.000001
2017-11-06 15:28:00	ND	0.00001 ± 0.000002
2017-11-13 09:59:00	0.0000034 ± 0.0000009	0.00002 ± 0.000003
2017-11-21 12:20:00	ND	0.00001 ± 0.000002
2017-11-28 12:49:00	ND	0.000011 ± 0.000002
2017-12-06 15:03:00	0.0000034 ± 0.000001	0.000034 ± 0.000004
2017-12-13 11:13:00	ND	0.000012 ± 0.000002
2017-12-20 11:40:00	0.0000015 ± 0.0000005	0.000011 ± 0.000002
2017-12-27 13:23:00	0.000006 ± 0.000001	0.000058 ± 0.000007
2018-01-04 14:25:00	0.0000029 ± 0.0000008	0.000012 ± 0.000002
2018-01-12 09:17:00	0.000008 ± 0.000001	0.000062 ± 0.000008
2018-01-19 14:54:00	0.000004 ± 0.000001	0.000014 ± 0.000002
2018-01-26 14:08:00	0.000002 ± 0.000001	0.00001 ± 0.000002
2018-02-02 09:40:00	0.000004 ± 0.000001	0.000037 ± 0.000005
2018-02-09 10:23:00	0.000007 ± 0.000001	0.000045 ± 0.000006
2018-02-16 13:58:00	0.000006 ± 0.000001	0.000023 ± 0.000003
2018-02-23 11:53:00	0.000014 ± 0.000002	0.00012 ± 0.00001
2018-03-02 18:16:00	0.000004 ± 0.000001	0.000013 ± 0.000002
2018-03-09 15:23:00	0.000004 ± 0.000001	0.00002 ± 0.000003
2018-03-16 14:48:00	0.000002 ± 0.000001	0.000011 ± 0.000002
2018-03-23 14:09:00	0.0000026 ± 0.0000009	0.000024 ± 0.000003
2018-03-30 17:31:00	ND	0.000014 ± 0.000002
2018-04-06 11:50:00	ND	0.00001 ± 0.000001
2018-04-13 12:10:00	ND	0.000011 ± 0.000002
2018-04-20 11:58:00	0.000003 ± 0.000001	0.000022 ± 0.000003
2018-04-27 12:39:00	0.000002 ± 0.000001	0.000014 ± 0.000002
2018-05-04 16:25:00	0.000002 ± 0.000001	0.000012 ± 0.000002
2018-05-11 15:10:00	0.0000018 ± 0.0000008	0.000017 ± 0.000002
2018-05-21 11:13:00	ND	0.000009 ± 0.000002
2018-05-28 10:05:00	ND	0.00001 ± 0.000001
2018-06-04 12:25:00	0.000003 ± 0.000001	0.000018 ± 0.000002
2018-06-11 10:44:00	0.000002 ± 0.000001	0.000015 ± 0.000003
2018-06-18 15:03:00	ND	0.000013 ± 0.000002
2018-06-25 10:43:00	0.000007 ± 0.000002	0.000009 ± 0.000002
2018-07-02 09:53:00	0.000002 ± 0.000001	0.000017 ± 0.000003
2018-07-09 10:18:00	0.0000012 ± 0.0000006	0.000008 ± 0.000001
2018-07-17 09:16:00	0.000003 ± 0.000001	0.000008 ± 0.000002
2018-07-24 10:01:00	0.000003 ± 0.000001	0.000015 ± 0.000003
2018-07-31 10:16:00	0.000003 ± 0.000001	0.000011 ± 0.000002
2018-08-07 09:52:00	ND	0.000007 ± 0.000002
2018-08-14 14:58:00	ND	0.00001 ± 0.000002
2018-08-21 11:45:00	ND	0.000009 ± 0.000002
2018-08-28 10:18:00	ND	0.000007 ± 0.000001
2018-09-04 10:40:00	ND	0.000011 ± 0.000002
2018-09-10 14:39:00	ND	0.000015 ± 0.000002
2018-09-18 09:07:00	ND	0.00001 ± 0.000002
2018-09-25 11:40:00	ND	0.000008 ± 0.000001
2018-10-02 16:48:00	ND	0.000008 ± 0.000002
2018-10-09 11:48:00	ND	0.000008 ± 0.000001
2018-10-16 12:11:00	ND	0.000007 ± 0.000001
2018-10-23 12:15:00	ND	0.0000051 ± 0.0000009
2018-11-02 13:46:00	ND	0.000004 ± 0.000001
2018-11-09 16:38:00	ND	0.000005 ± 0.000001
2018-11-16 10:18:00	ND	0.000022 ± 0.000003
2018-11-22 10:56:00	ND	0.000007 ± 0.000001
2018-11-29 10:10:00	ND	0.000013 ± 0.000002
2018-12-05 11:18:00	ND	0.000004 ± 0.000001
2018-12-13 10:48:00	ND	0.000005 ± 0.000001
2018-12-20 11:28:00	ND	0.000011 ± 0.000002
2018-12-27 10:10:00	ND	0.000013 ± 0.000002
2019-01-03 14:01:00	ND	0.000016 ± 0.000002
2019-01-10 11:20:00	ND	0.000015 ± 0.000002
2019-01-17 11:46:00	ND	0.000011 ± 0.000002
2019-01-24 11:21:00	ND	0.000014 ± 0.000002
2019-01-31 10:32:00	0.000002 ± 0.000001	0.000012 ± 0.000002
2019-02-14 11:19:00	ND	0.000011 ± 0.000002
2019-02-21 10:21:00	ND	0.000006 ± 0.000001
2019-02-28 11:05:00	ND	0.000008 ± 0.000002
2019-03-07 10:47:00	ND	0.000017 ± 0.000002
2019-03-14 12:00:00	0.000004 ± 0.000001	0.000017 ± 0.000002
2019-03-21 14:09:00	0.000004 ± 0.000001	0.000038 ± 0.000005

## Sheet: 2 Deposition
Sampling start time	Cs-134 Bq/m2			Cs-137 Bq/m2
yyyy/mm/dd (LT)	Total	Rain	Filter	Total	Rain	Filter
2011-03-01	176000	50000 ± 9000	126000 ± 6000	202000	55000 ± 9000	147000 ± 7000
2011-04-01	5900	5270 ± 20	600 ± 100	6600	5870 ± 20	800 ± 100
2011-05-01	3100	620 ± 50	2500 ± 200	3600	900 ± 100	2700 ± 300
2011-06-01	8300	6300 ± 800	1920 ± 50	9000	7000 ± 1000	2100 ± 400
2011-07-01	2100	1100 ± 100	1064 ± 6	2200	1100 ± 200	1147 ± 9
2011-08-01	860	660 ± 50	203 ± 3	1000	770 ± 80	234 ± 5
2011-09-01	1100	900 ± 200	167 ± 2	1300	1100 ± 300	178 ± 3
2011-10-01	NO DATA	NO DATA	NO DATA	NO DATA	NO DATA	NO DATA
2011-11-01	NO DATA	NO DATA	NO DATA	NO DATA	NO DATA	NO DATA
2011-12-01	160	97 ± 1	59 ± 2	210	138 ± 5	70 ± 10
2012-01-01	1400	1200 ± 300	210 ± 4	2200	1900 ± 500	260 ± 30
2012-02-01	570	170 ± 20	410 ± 40	750	250 ± 10	510 ± 90
2012-03-01	250	33 ± 3	220 ± 40	330	46 ± 2	290 ± 40
2012-04-01	170	77 ± 1	90 ± 10	220	100 ± 20	120 ± 20
2012-05-01	150	110 ± 10	45 ± 5	260	190 ± 30	73 ± 6
2012-06-01	24	ND	24 ± 4	90	51 ± 10	38 ± 7
2012-07-01	85	71 ± 10	14 ± 1	120	103 ± 4	17 ± 6
2012-08-01	39	17 ± 4	22 ± 2	66	27.8 ± 0.1	38 ± 4
2012-09-01	52.5	40 ± 10	13.7 ± 0.2	57	33 ± 1	24 ± 4
2012-10-01	43	24 ± 3	18 ± 2	60	26 ± 1	30 ± 10
2012-11-01	29.7	15 ± 3	14.3 ± 0.2	51	26 ± 2	24 ± 3
2012-12-01	210	180 ± 20	28 ± 4	364	320 ± 8	45 ± 1
2013-01-01	1600	1200 ± 20	400 ± 100	3100	2200 ± 200	840 ± 60
2013-02-01	200	200 ± 40	6 ± 1	390	370 ± 50	12 ± 2
2013-03-01	79	49 ± 5	30 ± 3	70	13 ± 3	58 ± 7
2013-04-01	32	18 ± 2	14 ± 2	63	34 ± 8	29 ± 3
2013-05-01	39.8	17.5 ± 0.2	22.3 ± 0.3	80	36 ± 3	44 ± 8
2013-06-01	20.58	14 ± 2	6.69 ± 0.04	41	27 ± 4	14 ± 2
2013-07-01	27.7	18 ± 6	9.6 ± 0.5	60	39 ± 4	21 ± 2
2013-08-01	56.28	53 ± 8	3.2 ± 0.6	116	111.5 ± 0.6	4.5 ± 0.6
2013-09-01	23.1	18 ± 4	5.4 ± 0.7	42	30 ± 1	12 ± 1
2013-10-01	12	ND	12 ± 1	70	47 ± 4	23 ± 4
2013-11-01	2.2	ND	2.2 ± 0.4	30.1	25 ± 1	5.1 ± 0.6
2013-12-01	99	90 ± 20	11 ± 1	222	198 ± 8	24 ± 4
2014-01-01	383.2	380 ± 30	3.5 ± 0.4	1000	1000 ± 100	9 ± 1
2014-02-01	93	70 ± 10	23.2 ± 0.3	242	188 ± 7	54 ± 9
2014-03-01	22	12 ± 2	10 ± 2	48.9	24 ± 0.9	25 ± 8
2014-04-01	6	ND	6 ± 1	34	21 ± 5	13 ± 1
2014-05-01	13.6	3.4 ± 0.6	10.2 ± 0.4	41.5	11.8 ± 0.5	30 ± 5
2014-06-01	2.229	ND	2.229 ± 0.009	14.151	9.7 ± 0.4	4.5 ± 0.5
2014-07-01	2.5	ND	2.5 ± 0.1	7	ND	7.0 ± 0.7
2014-08-01	29.6	29.6 ± 0.3	0 ± 0	80	80 ± 10	2.2 ± 0.2
2014-09-01	ND	ND	0 ± 0	ND	ND	ND
2014-10-01	1.59	ND	1.59 ± 0.04	5.1	ND	5.1 ± 0.9
2014-11-01	ND	ND	ND	1.6	ND	1.6 ± 0.2
2014-12-01	60	60 ± 7	ND	201	198 ± 8	3.2 ± 0.3
2015-01-01	183.9	180 ± 30	1.6 ± 0.4	630	630 ± 40	6 ± 1
2015-02-01	10.8	3.8 ± 0.4	7 ± 1.6	37	17 ± 1	20 ± 2
2015-03-01	16.6	7.1 ± 0.7	9.6 ± 0.9	52.9	17.9 ± 0.5	35 ± 4
2015-04-01	37.1	34.6 ± 0.4	2.5 ± 0.4	130	120 ± 10	7.6 ± 0.9
2015-05-01	6.5	4.6 ± 1.0	1.91 ± 0.03	22.7	17 ± 3	5.4 ± 0.7
2015-06-01	ND	ND	ND	9.27	4 ± 1	4.78 ± 0.06
2015-07-01	7.36	6 ± 3	0.96 ± 0.05	30	26 ± 6	3.8 ± 0.7
2015-08-01	5.1	ND	5.1 ± 0.4	41	20 ± 2	21 ± 8
2015-09-01	ND	ND	ND	16.2	15 ± 2	1.6 ± 0.2
2015-10-01	ND	ND	ND	10	8.8 ± 0.1	1.3 ± 0.1
2015-11-01	ND	ND	ND	1.6	ND	1.6 ± 0.3
2015-12-01	ND	ND	ND	5.2	3 ± 0.1	2.2 ± 0.2
2016-01-01	ND	ND	ND	3.2	ND	3.2 ± 0.3
2016-02-01	8	ND	8 ± 1	37	ND	37 ± 4
2016-03-01	ND	ND	0.42 ± 0.02	6.93	1.11 ± 0.05	5.8 ± 0.5
2016-04-01	17.2	1.4 ± 0.8	15.8 ± 0.4	97.8	3.1 ± 0.5	94.8 ± 0.4
2016-05-01	5	ND	5 ± 0.3	12.3	0.4 ± 0.5	12 ± 0.5
2016-06-01	ND	ND	ND	6	3.1 ± 0.7	2.9 ± 0.7
2016-07-01	2.7	1.5 ± 0.2	1.3 ± 0.3	9.1	3.1 ± 0.3	6 ± 0.2
2016-08-01	1.6	ND	1.6 ± 0.2	9.9	2.4 ± 0.6	7.5 ± 0.3
2016-09-01	1.49	ND	1.49 ± 0.03	3.3	1.6 ± 0.5	1.7 ± 0.3
2016-10-01	1.1	ND	1.1 ± 0.2	1.5	0.4 ± 0.1	1.1 ± 0.2
2016-11-01	ND	ND	ND	4.7	2.4 ± 0.5	2.3 ± 0.5
2016-12-01	1.8	ND	1.8 ± 0.4	11.3	0.5 ± 0.1	10.8 ± 0.4
2017-01-01	28	ND	28 ± 4	188.1	4.1 ± 0.4	184.0 ± 0.7
2017-02-01	2.4	ND	2.4 ± 0.4	28.9	17.9 ± 0.3	11 ± 0.5
2017-03-01	ND	ND	ND	59.3	55 ± 1	4.6 ± 0.3
2017-04-01	ND	ND	ND	7.3	2 ± 0.4	5.3 ± 0.4
2017-05-01	ND	ND	ND	14.5	1.9 ± 0.4	12.6 ± 0.3
2017-06-01	1.3	ND	1.3 ± 0.5	6.2	ND	6.2 ± 0.5
2017-07-01	ND	ND	ND	6.5	4 ± 1	2.8 ± 0.4
2017-08-01	ND	ND	ND	4.8	2.7 ± 0.7	2.1 ± 0.5
2017-09-01	ND	ND	ND	8.2	3.3 ± 0.7	5 ± 1
2017-10-01	ND	ND	ND	2.6	ND	2.6 ± 0.2
2017-11-01	ND	ND	ND	16.8	1.6 ± 0.4	15 ± 7
2017-12-01	ND	ND	ND	27.4	2.2 ± 0.6	25.2 ± 0.4
2018-01-01	ND	ND	ND	8.14	ND	8.14 ± 0.05
2018-02-01	ND	ND	ND	14.3	ND	14.3 ± 0.7
2018-03-01	ND	ND	ND	9	2.7 ± 0.5	6.4 ± 0.5
2018-04-01	ND	ND	ND	12.5	2.6 ± 0.4	9.9 ± 0.4
2018-05-01	ND	ND	ND	14.7	3.1 ± 0.5	11.6 ± 0.5
2018-06-01	ND	ND	ND	7.9	1.9 ± 0.4	6 ± 0.5
2018-07-01	ND	ND	ND	11.5	ND	11.5 ± 0.4
2018-08-01	ND	ND	ND	5.1	2.5 ± 0.8	2.6 ± 0.6
2018-09-01	ND	ND	ND	9.2	7 ± 1	2.4 ± 0.7
2018-10-01	ND	ND	ND	3.5	1.6 ± 0.6	1.9 ± 0.4
2018-11-01	ND	ND	ND	4.3	2.8 ± 0.6	1.5 ± 0.4
2018-12-01	ND	ND	ND	16.3	3.1 ± 0.4	13.2 ± 0.4
2019-01-01	ND	ND	ND	8.6	3 ± 1	5.7 ± 0.5
2019-02-01	ND	ND	ND	10.8	4.3 ± 0.7	6.5 ± 0.4
2019-03-01	ND	ND	ND	7.5	2 ± 0.7	5.5 ± 0.4
Cs-134の誤差はフィルターと雨を測定し，加算しているため，トータルでの誤差は省略
TotalCs137の値がいくつか変更しました。日数補正をしない値がTotalに入っていて，Ｄ欄＝Ｆ＋Ｈになります。ごめんなさい。
Rainの誤差は雨量と面積補正が含まれています。
Filterの誤差は面積補正が含まれています。

## Sheet: 3 Cascade Impactor
Sampling start date	>10.2 µm	10.2-4.2 µm	4.2-2.1 µm	2.1-1.3 µm	1.3-0.69 µm	0.69-0.39 µm	< 0.39 µm (backup)
yyyy/mm/dd (LT)	Bq/m3	Bq/m3	Bq/m3	Bq/m3	Bq/m3	Bq/m3	Bq/m3
2011-12-07 14:56:00	0.000048 ± 0.000005	0.000056 ± 0.000006	0.000015 ± 0.000002	0.000009 ± 0.000001	0.000005 ± 0.000001	0.000009 ± 0.000002	0.00012 ± 0.00001
2011-12-29 15:32:00	0.0001 ± 0.00001	0.000087 ± 0.000009	0.00017 ± 0.00002	0.000018 ± 0.000002	0.000025 ± 0.000003	0.00023 ± 0.00002	0.00028 ± 0.00003
2012-01-18 14:10:00	0.00018 ± 0.00002	0.00016 ± 0.00002	0.00011 ± 0.00001	0.000047 ± 0.000005	0.000069 ± 0.000007	0.000047 ± 0.000005	0.00031 ± 0.00003
2012-02-09 19:05:00	0.000062 ± 0.000007	0.000069 ± 0.000007	0.000055 ± 0.000006	0.000091 ± 0.00001	0.000027 ± 0.000003	0.00001 ± 0.000002	0.00021 ± 0.00002
2012-03-01 09:44:00	0.000026 ± 0.000003	0.000056 ± 0.000006	0.000015 ± 0.000002	0.000079 ± 0.000008	0.000015 ± 0.000002	0.00002 ± 0.000003	0.00019 ± 0.00002
2012-03-22 10:09:00	0.000044 ± 0.000005	0.00005 ± 0.000005	0.000033 ± 0.000004	0.000022 ± 0.000003	0.000013 ± 0.000002	0.000015 ± 0.000002	0.00031 ± 0.00003
2012-04-12 13:45:00	0.00003 ± 0.000004	0.000034 ± 0.000004	0.000012 ± 0.000002	0.000007 ± 0.000002	0.000017 ± 0.000003	0.000007 ± 0.000002	0.000066 ± 0.000007
2012-05-04 18:03:00	0.000034 ± 0.000004	0.000024 ± 0.000003	0.00001 ± 0.000002	0.000007 ± 0.000001	0.000014 ± 0.000002	0.00001 ± 0.000001	0.000059 ± 0.000006
2012-05-25 14:26:00	0.000016 ± 0.000002	0.000019 ± 0.000002	0.00001 ± 0.000002	0.000008 ± 0.000002	ND	ND	0.000026 ± 0.000003
2012-06-14 10:48:00	ND	0.000014 ± 0.000002	0.00001 ± 0.000001	0.000007 ± 0.000002	ND	ND	0.00001 ± 0.000002
2012-07-05 11:09:00	0.000035 ± 0.000004	0.000026 ± 0.000003	0.000016 ± 0.000002	0.000006 ± 0.000001	0.000007 ± 0.000001	0.000004 ± 0.000001	0.000012 ± 0.000001
2012-07-26 12:53:00	0.000009 ± 0.000002	0.000003 ± 0.000001	ND	0.000003 ± 0.000001	ND	ND	0.000019 ± 0.000004
2012-08-15 17:45:00	0.000026 ± 0.000003	0.000046 ± 0.000005	0.000015 ± 0.000002	0.000032 ± 0.000004	0.0000033 ± 0.0000008	ND	0.000024 ± 0.000003
2012-09-05 20:00:00	0.000008 ± 0.000002	0.000011 ± 0.000002	0.000008 ± 0.000002	0.000019 ± 0.000003	ND	0.000005 ± 0.000002	0.00002 ± 0.000003
2012-09-26 11:10:00	ND	0.000011 ± 0.000003	0.000009 ± 0.000001	ND	ND	ND	0.000027 ± 0.000003
2012-10-17 16:10:00	0.000015 ± 0.000002	0.000009 ± 0.000001	0.000009 ± 0.000001	0.0000046 ± 0.000001	0.000006 ± 0.000001	0.000007 ± 0.000001	0.000022 ± 0.000003
2012-11-08 10:20:00	ND	0.000026 ± 0.000003	0.000007 ± 0.000001	0.000006 ± 0.000001	0.0000042 ± 0.0000009	0.000007 ± 0.000001	0.000032 ± 0.000004
2012-11-29 10:04:00	0.000014 ± 0.000002	0.00002 ± 0.000002	0.000007 ± 0.000001	0.0000061 ± 0.0000009	ND	0.00001 ± 0.000001	0.000061 ± 0.000006
2012-12-20 10:12:00	0.000025 ± 0.000003	0.000031 ± 0.000003	0.000014 ± 0.000002	0.0000052 ± 0.0000008	0.000007 ± 0.000001	0.000003 ± 0.0000005	0.00012 ± 0.00001
2013-01-11 10:20:00	0.000008 ± 0.000001	0.000011 ± 0.000002	0.000017 ± 0.000002	0.0000044 ± 0.0000009	0.000012 ± 0.000002	0.0000049 ± 0.0000009	0.000059 ± 0.000007
2013-02-01 09:55:00	0.00002 ± 0.000003	0.000028 ± 0.000004	0.00003 ± 0.000004	0.000008 ± 0.000001	0.000008 ± 0.000001	0.000004 ± 0.000001	0.000115 ± 0.000014
2013-02-21 10:20:00	0.00003 ± 0.000004	0.000027 ± 0.000004	0.000026 ± 0.000003	0.000007 ± 0.000001	0.000006 ± 0.000001	0.000006 ± 0.000001	0.000077 ± 0.000009
2013-03-13 12:34:00	0.000009 ± 0.000001	0.000057 ± 0.000007	0.0000051 ± 0.0000008	0.0000033 ± 0.0000008	0.000007 ± 0.000001	0.0000044 ± 0.0000008	0.000079 ± 0.000009
2013-04-03 18:15:00	0.000009 ± 0.000002	0.000018 ± 0.000002	0.000004 ± 0.000001	0.0000016 ± 0.0000008	0.0000029 ± 0.0000009	0.000003 ± 0.000001	0.000044 ± 0.000005
2013-04-23 13:52:00	0.000008 ± 0.000001	0.000013 ± 0.000002	0.000007 ± 0.000001	0.000003 ± 0.000001	0.000005 ± 0.000001	0.0000062 ± 0.0000009	0.000054 ± 0.000006
2013-05-13 13:14:00	0.000073 ± 0.000008	0.000012 ± 0.000002	0.000007 ± 0.000001	0.0000041 ± 0.0000009	0.000004 ± 0.000001	0.000011 ± 0.000001	0.000032 ± 0.000004
2013-06-03 09:45:00	0.000002 ± 0.0000005	0.000068 ± 0.000008	0.000015 ± 0.000002	0.000007 ± 0.000001	0.0000015 ± 0.0000007	0.0000011 ± 0.0000005	0.000014 ± 0.000002
2013-06-20 09:52:00	0.0000045 ± 0.0000008	0.000016 ± 0.000002	0.000007 ± 0.000001	0.0000022 ± 0.0000005	0.0000008 ± 0.0000004	0.0000009 ± 0.0000005	0.0000072 ± 0.000001
2013-07-08 14:40:00	0.0000046 ± 0.0000008	0.00003 ± 0.000004	0.000008 ± 0.000002	0.000007 ± 0.000001	0.000002 ± 0.000001	ND	0.000018 ± 0.000002
2013-07-29 13:43:00	0.000004 ± 0.0000007	0.000013 ± 0.000002	0.000008 ± 0.000001	0.0000051 ± 0.0000009	0.0000013 ± 0.0000005	ND	0.0000031 ± 0.0000006
2013-08-19 11:58:00	0.000009 ± 0.000001	0.000026 ± 0.000003	0.000009 ± 0.000001	0.000003 ± 0.000001	0.000002 ± 0.000001	ND	0.000008 ± 0.000001
2013-09-09 12:36:00	0.000015 ± 0.000003	0.000018 ± 0.000003	0.000019 ± 0.000004	0.000003 ± 0.000001	ND	ND	0.0000054 ± 0.000001
2013-09-30 09:53:00	0.000006 ± 0.000001	0.000011 ± 0.000002	0.000007 ± 0.000001	0.0000048 ± 0.0000009	0.0000015 ± 0.0000006	0.0000021 ± 0.0000007	0.000005 ± 0.000001
2013-10-21 14:32:00	0.0000017 ± 0.0000007	0.000016 ± 0.000003	0.000006 ± 0.000001	0.0000029 ± 0.0000008	0.000018 ± 0.000003	0.0000042 ± 0.0000009	0.000029 ± 0.000005
2013-11-11 09:51:00	0.000008 ± 0.000001	0.00001 ± 0.000002	0.000005 ± 0.000001	0.0000016 ± 0.0000006	0.0000029 ± 0.0000007	0.0000046 ± 0.0000009	0.000018 ± 0.000003
2013-12-02 09:45:00	0.0000038 ± 0.0000009	0.0000053 ± 0.000001	0.000002 ± 0.0000004	0.000006 ± 0.000001	0.0000035 ± 0.0000006	0.0000037 ± 0.0000007	0.000047 ± 0.000008
2013-12-24 10:08:00	0.00001 ± 0.000002	0.00001 ± 0.000002	0.0000043 ± 0.0000009	0.000005 ± 0.000001	0.0000019 ± 0.0000007	0.000008 ± 0.000001	0.000044 ± 0.000007
2014-01-14 14:30:00	0.00001 ± 0.000002	0.00002 ± 0.000003	0.0000037 ± 0.0000009	0.0000017 ± 0.0000007	0.0000038 ± 0.0000008	0.000003 ± 0.0000006	0.00008 ± 0.00001
2014-02-03 09:52:00	0.000008 ± 0.000001	0.000043 ± 0.000007	0.000006 ± 0.000001	0.000003 ± 0.0000008	0.0000025 ± 0.0000008	0.000005 ± 0.000001	0.000049 ± 0.000008
2014-02-24 10:12:00	0.00001 ± 0.000002	0.000015 ± 0.000002	0.000006 ± 0.000001	0.00001 ± 0.000002	0.0000034 ± 0.0000009	0.000009 ± 0.000002	0.000052 ± 0.000008
2014-03-17 10:08:00	0.0000057 ± 0.0000008	0.000009 ± 0.000001	0.0000025 ± 0.0000009	0.0000031 ± 0.0000005	0.0000014 ± 0.0000004	0.000012 ± 0.000002	0.000047 ± 0.000006
2014-04-07 14:10:00	0.000019 ± 0.000003	0.000007 ± 0.000001	0.0000035 ± 0.0000008	0.0000014 ± 0.0000006	0.0000032 ± 0.0000007	0.0000021 ± 0.0000006	0.000034 ± 0.000004
2014-04-29 14:36:00	0.0000066 ± 0.0000009	0.000004 ± 0.000001	0.000032 ± 0.000004	ND	0.0000038 ± 0.0000005	0.000002 ± 0.000001	0.000025 ± 0.000003
2014-05-19 17:29:00	0.000006 ± 0.000001	0.000016 ± 0.000003	0.000006 ± 0.000001	0.0000038 ± 0.0000008	0.0000016 ± 0.0000006	0.0000023 ± 0.0000006	0.000008 ± 0.000002
2014-06-11 09:50:00	0.000005 ± 0.0000009	0.000007 ± 0.000001	0.000007 ± 0.000001	0.000003 ± 0.0000007	0.0000014 ± 0.0000005	ND	0.0000047 ± 0.0000007
2014-07-04 12:56:00	0.0000035 ± 0.0000008	0.000008 ± 0.000001	0.000008 ± 0.000001	0.0000028 ± 0.0000007	ND	ND	0.0000026 ± 0.0000009
2014-07-24 17:43:00	0.000011 ± 0.000002	0.000006 ± 0.000001	0.0000047 ± 0.0000007	0.0000024 ± 0.0000005	0.0000007 ± 0.0000004	0.0000011 ± 0.0000005	0.000012 ± 0.000001
2014-08-12 18:03:00	0.0000046 ± 0.0000009	0.000016 ± 0.000002	0.00002 ± 0.000003	0.0000046 ± 0.0000009	ND	0.0000013 ± 0.0000006	0.0000029 ± 0.0000004
2014-09-03 17:06:00	0.0000031 ± 0.0000007	0.000008 ± 0.000001	0.000006 ± 0.000001	0.0000032 ± 0.0000006	0.0000009 ± 0.0000003	0.0000019 ± 0.0000006	0.0000049 ± 0.0000008
2014-09-24 11:19:00	0.000006 ± 0.0000011	0.000011 ± 0.000002	0.0000046 ± 0.0000009	0.0000017 ± 0.0000006	ND	ND	0.0000035 ± 0.0000006
2014-10-15 11:46:00	0.0000045 ± 0.0000009	0.000005 ± 0.000001	0.0000031 ± 0.0000008	0.0000028 ± 0.0000007	0.0000023 ± 0.0000007	0.0000018 ± 0.0000007	0.000012 ± 0.000002
2014-11-05 12:02:00	0.000006 ± 0.000001	0.000009 ± 0.000002	0.0000044 ± 0.0000009	ND	0.0000018 ± 0.0000007	0.0000039 ± 0.0000008	0.000048 ± 0.000005
2014-11-27 10:58:00	0.0000041 ± 0.0000009	0.0000045 ± 0.0000009	0.0000023 ± 0.0000007	0.0000026 ± 0.0000007	0.0000018 ± 0.0000006	0.0000032 ± 0.0000007	0.000015 ± 0.000002
2014-12-19 14:22:00	0.000043 ± 0.000007	0.0000036 ± 0.0000007	0.0000026 ± 0.0000006	ND	ND	0.0000011 ± 0.0000005	0.000017 ± 0.000002
2015-01-09 09:55:00	0.000004 ± 0.0000008	0.0000053 ± 0.0000009	0.0000019 ± 0.0000005	0.0000015 ± 0.0000005	0.0000035 ± 0.0000007	0.0000022 ± 0.0000006	0.000027 ± 0.000003
2015-01-30 09:52:00	0.000003 ± 0.000001	0.00001 ± 0.000002	0.0000044 ± 0.0000008	0.000008 ± 0.000002	0.0000018 ± 0.0000003	0.0000054 ± 0.0000009	0.000029 ± 0.000005
2015-02-20 16:16:00	0.000009 ± 0.000001	0.0000049 ± 0.000001	0.0000012 ± 0.0000003	0.0000012 ± 0.0000004	0.0000014 ± 0.0000006	0.000001 ± 0.0000003	0.000013 ± 0.000002
2015-03-12 18:20:00	0.000007 ± 0.000001	0.000014 ± 0.000002	0.0000025 ± 0.0000006	0.0000019 ± 0.0000005	0.0000013 ± 0.0000005	0.0000014 ± 0.0000004	0.000025 ± 0.000004
2015-04-03 18:15:00	0.0000027 ± 0.0000006	0.0000042 ± 0.0000008	0.0000019 ± 0.0000005	ND	ND	0.0000015 ± 0.0000005	0.0000052 ± 0.0000007
2015-04-24 09:44:00	0.00001 ± 0.000002	0.0000039 ± 0.0000008	0.0000017 ± 0.0000005	0.0000012 ± 0.0000005	0.0000042 ± 0.0000008	ND	0.000015 ± 0.000003
2015-05-14 18:28:00	0.000007 ± 0.000001	0.0000036 ± 0.0000007	0.0000016 ± 0.0000005	ND	0.000004 ± 0.0000007	ND	0.000027 ± 0.000005
2015-06-05 10:05:00	0.0000023 ± 0.0000004	0.0000044 ± 0.0000008	0.0000037 ± 0.0000007	0.0000013 ± 0.0000004	0.0000003 ± 0.0000004	0.0000005 ± 0.0000004	0.0000027 ± 0.0000005
2015-06-26 16:12:00	0.0000023 ± 0.0000005	0.000031 ± 0.000005	0.0000032 ± 0.0000005	0.0000038 ± 0.0000005	0.0000007 ± 0.0000003	0 ± 0.0000003	0.0000057 ± 0.0000008
2015-07-17 12:38:00	0.0000027 ± 0.0000006	0.000009 ± 0.000001	0.000003 ± 0.0000006	0.000031 ± 0.000005	0.0000007 ± 0.0000004	0.0000005 ± 0.0000004	0.0000025 ± 0.0000004
2015-08-07 12:05:00	0.0000015 ± 0.0000005	0.000004 ± 0.0000008	0.0000048 ± 0.0000009	0.0000021 ± 0.0000006	0.0000011 ± 0.0000005	0.0000007 ± 0.0000004	0.0000014 ± 0.0000005
2015-08-27 15:58:00	0.0000016 ± 0.0000005	0.000007 ± 0.000001	0.0000042 ± 0.0000008	0.0000026 ± 0.0000006	0.0000005 ± 0.0000004	0.0000006 ± 0.0000004	0.0000024 ± 0.0000005
2015-09-18 14:21:00	0.0000013 ± 0.0000005	0.000004 ± 0.0000008	0.0000021 ± 0.0000005	0.0000008 ± 0.0000004	0.0000006 ± 0.0000004	0.0000001 ± 0.0000004	0.000003 ± 0.0000005
2015-10-09 14:30:00	0.0000025 ± 0.0000005	0.0000053 ± 0.0000009	0.0000012 ± 0.0000004	0.0000008 ± 0.0000004	0.0000008 ± 0.0000003	0.0000007 ± 0.0000004	0.0000058 ± 0.0000008
2015-11-02 12:58:00	0.000007 ± 0.000001	0.0000009 ± 0.0000004	0.0000006 ± 0.0000004	0.0000008 ± 0.0000004	0.0000006 ± 0.0000004	0.0000008 ± 0.0000004	0.0000042 ± 0.0000007
2015-11-23 15:30:00	0.0000019 ± 0.0000004	0.0000017 ± 0.0000004	ND	ND	0.0000015 ± 0.0000004	0.0000013 ± 0.0000005	0.0000059 ± 0.000001
2015-12-11 10:15:00	ND	0.000001 ± 0.0000004	ND	ND	ND	ND	0.0000061 ± 0.0000008
2016-01-04 13:00:00	0.0000018 ± 0.0000004	0.000002 ± 0.0000004	ND	0.0000009 ± 0.0000004	ND	ND	0.000006 ± 0.000001
2016-01-25 11:04:00	0.0000024 ± 0.0000005	0.0000025 ± 0.0000005	0.0000015 ± 0.0000004	0.000005 ± 0.0000009	0.0000042 ± 0.0000008	ND	0.00007 ± 0.000009
2016-02-16 11:40:00	0.0000013 ± 0.0000004	0.0000021 ± 0.0000005	ND	ND	ND	ND	0.000026 ± 0.000003
2016-03-07 15:02:00	ND	0.0000012 ± 0.0000004	ND	0.0000012 ± 0.0000004	ND	ND	0.000014 ± 0.000002
2016-03-29 10:29:00	ND	0.0000037 ± 0.0000007	ND	ND	ND	ND	0.000011 ± 0.000001
2016-04-19 12:50:00	0.000003 ± 0.0000006	0.0000024 ± 0.0000005	0.000008 ± 0.000001	ND	ND	ND	0.000018 ± 0.000002
2016-05-10 17:00:00	0.0000016 ± 0.0000004	0.0000012 ± 0.0000004	ND	ND	ND	ND	0.0000048 ± 0.0000008
2016-05-31 15:30:00	0.0000026 ± 0.0000006	0.000004 ± 0.0000007	ND	ND	ND	ND	0.0000058 ± 0.0000009
2016-06-21 17:13:00	ND	0.0000015 ± 0.0000004	0.0000016 ± 0.0000004	ND	ND	ND	0.0000013 ± 0.0000004
2016-07-12 14:50:00	0.0000028 ± 0.0000006	0.0000034 ± 0.0000007	0.0000016 ± 0.0000004	ND	ND	ND	0.0000022 ± 0.0000005
2016-08-02 17:07:00	0.0000038 ± 0.0000007	0.0000021 ± 0.0000005	ND	ND	ND	ND	0.0000022 ± 0.0000005
2016-08-23 17:55:00	0.000007 ± 0.000001	0.0000019 ± 0.0000005	0.0000024 ± 0.0000005	ND	ND	ND	0.0000015 ± 0.0000004
2016-09-13 15:35:00	ND	0.0000037 ± 0.0000007	0.0000045 ± 0.0000008	ND	ND	ND	0.0000019 ± 0.0000004
2016-10-06 10:50:00	0.0000011 ± 0.0000004	0.0000017 ± 0.0000004	ND	ND	0.0000033 ± 0.0000006	ND	0.0000033 ± 0.0000006
2016-10-31 10:20:00	ND	0.0000024 ± 0.0000006	0.0000025 ± 0.0000007	0.00001 ± 0.000001	0.000008 ± 0.000001	0.000001 ± 0.0000005	0.0000058 ± 0.0000009
2016-11-21 11:02:00	0.0000013 ± 0.0000004	0.0000011 ± 0.0000004	ND	ND	ND	ND	0.000009 ± 0.000001
2016-12-13 14:30:00	0.0000011 ± 0.0000004	0.0000009 ± 0.0000004	ND	0.0000009 ± 0.0000004	ND	ND	0.000009 ± 0.000001
2017-01-04 11:30:00	0.0000021 ± 0.0000006	0.0000017 ± 0.0000005	0.000001 ± 0.0000004	0.0000016 ± 0.0000004	0.0000008 ± 0.0000003	0.0000018 ± 0.0000004	0.0000055 ± 0.0000008
2017-01-25 16:00:00	0.0000021 ± 0.0000005	0.0000022 ± 0.0000005	ND	ND	0.0000021 ± 0.0000005	ND	0.000015 ± 0.000002
2017-02-16 16:22:00	0.0000029 ± 0.0000005	0.0000039 ± 0.0000007	0.0000019 ± 0.0000005	0.0000022 ± 0.0000005	0.0000023 ± 0.0000005	0.0000019 ± 0.0000005	0.000036 ± 0.000004
2017-03-08 11:00:00	0.0000012 ± 0.0000004	0.0000015 ± 0.0000005	ND	ND	ND	ND	0.000008 ± 0.000001
2017-03-31 14:00:00	0.0000016 ± 0.0000005	0.0000029 ± 0.0000006	ND	ND	0.0000012 ± 0.0000004	ND	0.000009 ± 0.000001
2017-04-21 11:25:00	0.0000023 ± 0.0000005	0.0000021 ± 0.0000004	0.0000018 ± 0.0000005	ND	0.0000009 ± 0.0000004	0.0000007 ± 0.0000005	0.000016 ± 0.000002
2017-05-11 16:46:00	0.0000011 ± 0.0000004	0.0000014 ± 0.0000005	ND	ND	ND	ND	0.0000038 ± 0.0000008
2017-06-02 14:05:00	0.000008 ± 0.000001	0.0000015 ± 0.0000005	ND	ND	ND	ND	0.0000029 ± 0.0000005
2017-06-23 12:04:00	ND	0.0000012 ± 0.0000005	0.0000016 ± 0.0000005	ND	ND	ND	0.0000039 ± 0.0000007
2017-07-13 10:18:00	0.0000012 ± 0.0000004	0.0000023 ± 0.0000005	0.0000011 ± 0.0000004	ND	ND	ND	0.0000011 ± 0.0000004
2017-08-03 11:10:00	ND	0.0000024 ± 0.0000006	0.0000023 ± 0.0000005	ND	ND	ND	0.0000008 ± 0.0000003
2017-08-24 11:50:00	0.000005 ± 0.000001	ND	0.000006 ± 0.000002	0.000009 ± 0.000002	0.000004 ± 0.000001	0.000004 ± 0.000001	0.000008 ± 0.000002
2017-08-31	0.0000026 ± 0.0000006	0.0000016 ± 0.0000005	0.0000012 ± 0.0000004	0.0000011 ± 0.0000004	0.000008 ± 0.000001	ND	0.0000019 ± 0.0000005
2017-09-22 16:30:00	ND	0.0000018 ± 0.0000005	ND	ND	ND	ND	0.0000007 ± 0.0000004
2017-10-16 14:33:00	ND	ND	0.0000012 ± 0.0000004	ND	ND	ND	0.0000022 ± 0.0000005
2017-11-06 16:02:00	ND	0.000008 ± 0.000001	0.0000014 ± 0.0000005	ND	ND	ND	0.0000033 ± 0.0000006
2017-11-27 14:20:00	0.000002 ± 0.0000005	0.0000014 ± 0.0000004	ND	ND	ND	ND	0.0000039 ± 0.0000007
2017-12-19 11:57:00	ND	ND	ND	0.0000013 ± 0.0000004	ND	ND	0.000012 ± 0.000002
2018-01-09 11:50:00	0.0000032 ± 0.0000007	0.0000015 ± 0.0000005	0.0000023 ± 0.0000006	ND	ND	ND	0.0000055 ± 0.0000008
2018-01-30 14:11:00	0.000011 ± 0.000002	0.0000031 ± 0.0000007	0.0000017 ± 0.0000005	0.000012 ± 0.000002	ND	ND	0.000019 ± 0.000002
2018-02-20 14:34:00	ND	0.000002 ± 0.0000005	ND	ND	ND	0.000014 ± 0.000002	0.000011 ± 0.000002
2018-03-13 14:24:00	0.000016 ± 0.000002	0.0000024 ± 0.0000006	ND	0.0000012 ± 0.0000007	ND	0.000001 ± 0.0000006	0.000013 ± 0.000002
2018-04-03 10:58:00	ND	ND	ND	ND	ND	ND	0.000021 ± 0.000003
2018-04-24 10:49:00	ND	0.0000023 ± 0.0000005	0.0000025 ± 0.0000007	0.0000072 ± 0.0000009	0.0000005 ± 0.0000005	ND	ND
2018-05-15 10:56:00	ND	0.0000024 ± 0.0000005	ND	ND	ND	ND	0.000003 ± 0.0000007
2018-06-05 14:00:00	ND	ND	0.0000015 ± 0.0000004	ND	ND	ND	0.0000017 ± 0.0000004
2018-06-27 09:30:00	0.000002 ± 0.0000006	0.0000037 ± 0.0000006	ND	ND	ND	ND	0.0000024 ± 0.0000006
2018-07-18 09:57:00	0.0000053 ± 0.0000007	0.0000015 ± 0.0000003	0.0000009 ± 0.0000004	0.000001 ± 0.0000003	0.0000008 ± 0.0000004	ND	0.0000039 ± 0.0000008
2018-08-08 14:08:00	0.0000007 ± 0.0000004	0.0000023 ± 0.0000005	0.0000016 ± 0.0000004	ND	ND	ND	0.0000015 ± 0.0000006
2018-08-29 13:50:00	ND	0.0000027 ± 0.0000006	0.000002 ± 0.0000005	ND	ND	ND	ND
2018-09-19 11:30:00	ND	0.0000034 ± 0.0000007	0.0000026 ± 0.0000006	ND	ND	ND	0.000001 ± 0.0000005
2018-10-10 11:45:00	0.0000011 ± 0.0000006	0.0000015 ± 0.0000006	0.000002 ± 0.0000006	ND	0.0000009 ± 0.0000005	0.0000007 ± 0.0000006	0.0000017 ± 0.0000005
2018-11-02 14:27:00	ND	ND	ND	ND	ND	ND	0.0000033 ± 0.0000007
2018-11-22 11:41:00	0.0000009 ± 0.0000004	0.0000015 ± 0.0000005	0.0000019 ± 0.0000007	ND	ND	0.0000008 ± 0.0000003	0.0000059 ± 0.0000008
2018-12-13 11:26:00
2019-01-03 14:40:00
2019-01-24 11:58:00
2019-02-14 11:58:00
2019-03-07 11:35:00

## Sheet: 4 Impactor-Cyclone
Sampling start date	Impactor >2.5 µm	Cyclone 0.1-2.5 µm
yyyy/mm/dd (LT)	Cs-137 (Bq/m3)	Cs-137 (Bq/m3)
2014-10-01	0.000014 ± 0.000001	0.0000092 ± 0.0000006
2014-11-01	0.00001 ± 0.000001	0.0000051 ± 0.0000007
2014-12-01	0.000016 ± 0.000001	0.0000025 ± 0.0000006
2015-01-01	0.0000119 ± 0.0000008	0.0000077 ± 0.0000008
2015-02-01	0.0000161 ± 0.0000006	0.0000355 ± 0.0000005
2015-03-01	0.0000094 ± 0.0000007	0.0000008 ± 0.0000003
2015-04-01	0.0000065 ± 0.0000008	0.0000195 ± 0.0000007
2015-05-01	0.0000175 ± 0.0000005	0.000004 ± 0.0000002
2015-06-01	0.0000132 ± 0.0000008	0.0000098 ± 0.0000006
2015-07-01	0.0000174 ± 0.0000009	0.0000045 ± 0.0000004
2015-08-01	0.0000221 ± 0.0000004	0.0000061 ± 0.0000007
2015-09-01	0.0000187 ± 0.0000009	0.0000094 ± 0.0000007
2015-10-01	0.0000072 ± 0.0000007	0.0000179 ± 0.0000006
2015-11-01	0.0000066 ± 0.0000007	0.0000083 ± 0.0000006
2015-12-01	0.0000079 ± 0.0000005	0.0000104 ± 0.0000005
2016-01-01	0.0000035 ± 0.0000007	0.0000059 ± 0.0000007
2016-02-01	0.0000082 ± 0.0000009	0.0000174 ± 0.0000008
2016-03-01	0.0000061 ± 0.0000006	0.0000159 ± 0.0000007
2016-04-01	0.0000124 ± 0.0000009	0.0000139 ± 0.0000003
2016-05-01	0.0000081 ± 0.0000005	0.000006 ± 0.0000005
2016-06-01	0.000014 ± 0.000001	0.0000035 ± 0.0000006
2016-07-01	0.0000088 ± 0.0000006	0.0000036 ± 0.0000005
2016-08-01	0.0000104 ± 0.0000009	0.0000012 ± 0.0000003
2016-09-01	0.0000166 ± 0.0000007	0.000001 ± 0.0000002
2016-10-01	0.0000081 ± 0.0000005	0.0000022 ± 0.0000003
2016-11-01	0.000042 ± 0.000001	0.0000028 ± 0.0000003
2016-12-01	0.0000067 ± 0.0000007	0.0000039 ± 0.0000004
2017-01-01	0.0000028 ± 0.0000004	0.0000129 ± 0.0000003
2017-02-01	0.000008 ± 0.0000008	0.0000154 ± 0.0000005
2017-03-01	0.0000095 ± 0.0000006	0.0000248 ± 0.0000006
2017-04-01	0.0000037 ± 0.0000006	0.0000115 ± 0.0000003
2017-05-01	0.000008 ± 0.0000007	0.0000667 ± 0.0000003
2017-06-01	0.0000043 ± 0.0000007	0.0000048 ± 0.0000003
2017-07-01	0.0000085 ± 0.0000007	0.0000012 ± 0.0000003
2017-08-01	0.0000119 ± 0.0000005	0.0000014 ± 0.0000002
2017-09-01	0.0000081 ± 0.0000005	0.0000016 ± 0.0000003
2017-10-01	0.000008 ± 0.0000004	0.000002 ± 0.0000002
2017-11-01	0.0000189 ± 0.0000008	0.0000091 ± 0.0000004
2017-12-01	0.0000093 ± 0.0000006	0.0000274 ± 0.0000005

## Sheet: 5 PMf-XRF
Sampling start date	yyyy/mm/dd (LT)	2014-09-01	2014-10-01	2014-11-01	2014-12-01	2015-01-01	2015-02-01	2015-03-01	2015-04-01	2015-05-01	2015-06-01	2015-07-01	2015-08-01	2015-09-01	2015-10-01	2015-11-01	2015-12-01	2016-01-01	2016-02-01	2016-03-01	2016-04-01	2016-05-01	2016-06-01	2016-07-01	2016-08-01	2016-09-01	2016-10-01	2016-11-01	2016-12-01	2017-01-01	2017-02-01	2017-03-01	2017-04-01	2017-05-01	2017-06-01	2017-07-01	2017-08-01	2017-09-01	2017-10-01	2017-11-01	2017-12-01	2018-01-01
SiO2	%	23.6998	25.6936	25.4104	25.3704	30.4485	35.9666	35.482	48.1109	57.8147	45.1762	31.5123	36.6434	26.0165	40.7407	29.5516	36.635	49.9744	24.082	35.7891	60.7316	47.291	37.1556	30.8283	29.9868	24.427	37.2345	37.9964	37.4446	36.4963	48.7606	35.7891	51.9786	49.991	43.1275	38.4209	24.0283	32.4681	23.0053	19.9076	37.6335	41.1291
Al2O3	%	27.5389	33.1329	32.5794	31.8522	30.0662	28.9053	22.2797	19.4934	17.9921	23.5236	31.9951	25.0477	36.6272	23.4375	25.7046	26.3939	18.3194	26.9405	19.7817	14.6527	18.5318	23.4818	37.0673	34.0758	41.4104	26.9646	26.9153	26.1581	23.3435	20.7837	19.7817	18.9773	18.0496	17.7214	29.6574	44.2425	31.5212	30.128	25.2175	26.1961	21.5658
CaO	%	3.2393	2.6364	2.9357	3.5184	4.2028	3.0221	6.6313	5.2425	3.9614	3.3118	2.7143	2.7436	1.6879	3.2872	3.3449	3.9957	7.4384	3.067	8.6334	4.6398	5.5869	4.5489	2.0668	3.7622	1.3551	5.798	2.8444	3.0937	5.9187	5.4423	8.6334	3.625	4.0311	7.1142	2.5953	1.2637	2.2885	1.8209	5.0966	2.6687	5.5649
Cl	%	1.4917	2.1922	2.3927	2.636	4.1871	2.9345	4.08	2.2086	1.3201	0.9249	0.6771	0.837	0.9189	1.9612	3.2414	2.8103	4.4753	4.2941	4.4941	2.3335	2.9691	3.1289	1.1768	1.866	1.6761	2.3715	1.9224	3.072	4.7392	3.8193	4.4941	2.8425	2.1178	2.6368	1.4969	2.1638	2.3679	3.752	5.7324	3.2942	3.6593
Cr2O3	%	0	0	0	0	0	0	0	0	0	0	0	0	0	0	0	0	0.1224	0	0	0	0	0	0	0	0	0	0	0	0	0	0	0	0	2.062	0	0	0	0	0	0	0.1633
CuO	%	0	0.03		0.0672	0.0463	0.0365	0	0.0398	0	0	0	0	0	0	0	0.0282	0.042	0	0.0488	0	0	0.0475	0	0.0345	0	0	0	0	0.0597	0.0315	0.0488	0.0408	0	0	0.0368	0.0382	0.0417	0	0	0	0.0577
Fe2O3	%	1.3468	0.6305	0.9651	2.2942	1.6459	0.8136	2.1686	1.9351	1.6942	1.1179	0.69	0.7283	0.5167	1.0629	0.8891	1.0368	1.5134	0.9749	2.2224	1.0245	1.8403	1.8298	0.67	1.1912	0.3961	0.9181	0.6842	0.8434	1.9467	1.4868	2.2224	1.3022	1.289	2.062	0.7746	0.4254	0.7645	0.4065	2.1819	0.8297	3.3166
K2O	%	2.6723	1.1035	1.5317	1.4455	1.5383	1.2588	3.5284	3.6764	2.9342	2.1199	1.4564	1.425	0.8433	1.5832	1.9156	1.4014	2.3101	2.0679	4.1047	2.9689	4.6	2.7188	1.301	1.6691	0.8286	1.5806	0.9815	1.3148	1.844	1.653	4.1047	2.8826	2.9609	3.3677	1.5649	0.8849	1.8484	1.4157	3.2099	1.3392	2.3939
MgO	%	3.6222	2.2931	2.5953	2.5604	1.8675	2.5617	3.9957	2.9665	3.0787	2.6331	2.9905	2.6948	1.6469	2.8943	2.3607	2.7593	2.0025	2.9956	2.8316	2.0287	2.5497	2.8341	0	1.5505	1.8479	2.4672	3.65	2.8541	1.8335	3.137	2.8316	3.4687	3.3953	2.7858	2.2058	0	0	4.4419	2.3457	2.7846	1.4455
MnO	%		0.0655	0	0	0.0971	0	0	0.0949	0	0	0	0	0	0	0.1082	0	0.0908	0.0894		0.0787	0	0	0	0	0	0.0662	0	0	0	0	0	0	0	0	0	0	0	0	0.2612	0	0.1253
Na2O	%	3.8394	5.5547	5.836	6.254	4.9554	6.7318	4.6756	3.0235	0	4.7485	3.1755	6.4902	4.546	5.3746	8.3558	6.1013	4.4496	12.8638	3.5587	3.2275	0	5.242	4.3211	3.2635	5.1086	4.3254	7.946	7.0632	5.2596	4.8709	3.5587	4.4169	4.1159	0	0	4.137	5.2271	13.5708	11.9148	9.7337	6.2357
P2O5	%	4.3415	1.3857	1.1268	0.9083	0.8641	0.6533	1.208	1.8189	1.8524	1.6403	1.7094	1.4353	1.6155	1.6123	0.9392	0.7278	0.9357	0	2.1507	2.3745	2.9885	1.5082	1.1856	1.5022	1.4732	1.5809	1.236	1.2164	0.8553	0.8605	2.1507	1.8149	3.2855	2.245	2.0145	1.275	2.5549	1.0754	0.9313	1.1527	1.104
SO3	%	28.1359	25.2434	24.5705	22.962	19.7005	17.0912	15.8596	10.8157	8.8543	14.7749	23.0484	21.9259	25.5477	18.0034	23.4839	18.0731	8.2297	22.5356	15.6716	5.5068	13.5889	17.3939	21.3831	21.055	21.4771	16.6549	15.8238	16.8992	17.5784	9.1029	15.6716	8.6119	10.7244	18.8249	21.1929	21.5413	20.8894	20.3288	22.8176	14.3099	12.3718
TiO2	%	0	0	0	0	0.2959	0	0	0.5319	0.4668	0	0	0	0	0	0	0	0.0963	0	0.6149	0.4329	0	0	0	0	0	0	0	0	0	0	0.6149	0	0	0	0	0	0	0	0	0	0.6024
ZnO	%	0.0721	0.0385	0.0564	0.1315	0.0842	0.0246	0.0912	0.042	0.0311	0.0288	0.031	0.0286	0.0333	0.0426	0.105	0.0372	0	0.0891	0.0984	0	0.0539	0.1105	0	0.0432	0	0.0381	0	0.0404	0.1251	0.0513	0.0984	0.0386	0.0395	0.1147	0.0399	0	0.0284	0.0549	0.3834	0.0577	0

## Sheet: 6 all-XRF
	Fine sediment particles	Coarse sediment particles	PMf	Particulate fractions of precipitation
Al2O3	18.3605	15.7161	26.294	17.1796
CaO	2.80333	2.48281	4.03349	2.58196
Fe2O3	9.51705	6.25681	1.2842	2.82899
K2O	1.40129	1.62414	2.10609	3.02207
MgO	1.91014	1.66152	2.48312	3.57052
MnO	0.160952	0.102619	0.122918	0.0645761
Na2O	1.2931	1.85171	5.12764	1.92537
P2O5	0.105667	0.0879048	1.54416	2.70347
SiO2	59.8441	67.881	36.3402	61.7253
TiO2	0.789095	0.521143	0.0891707	0.767942
Sum	96.1852	98.1858	79.4251	96.3698
